# Supplementary material for: Clinical Risk and Outpatient Therapy Utilization for COVID-19 in the Medicare Population
Source: PubMed Central journal article supplement (PMC10818223; doi:10.1001/jamahealthforum.2023.5044), 2024-01-26
Supplement: jamahealthforum-e235044-s001.pdf [file jamahealthforum-e235044-s001.pdf]

## Supplemental Online Content

Wilcock AD, Kissler S, Mehrotra A, et al. Clinical risk and outpatient therapy utilization for COVID-19 in the Medicare population. *JAMA Health Forum*. 2024;5(1):e235044. doi:10.1001/jamahealthforum.2023.5044

**eMethods 1.** Therapy, Testing, and Vaccination Codes

**eMethods 2.** Model Specification

**eMethods 3.** Primary Care Practice Attribution and Nirmatrelvir Contraindications

**eMethods 4.** Details on Simulated Reallocation of Nirmatrelvir

**eTable 1.** Mortality Following COVID-19 Diagnosis Risk Model Coefficients

**eTable 2.** Rates of COVID-19 Therapy by demographics Among Patients With a COVID-19 Diagnosis in 2022

**eTable 3.** Proportion of Treatment Doses Proximate to a COVID-19 Diagnosis

**eTable 4.** Characteristics of Oral Therapy Use With and Without COVID-19 Diagnosis

**eTable 5.** Rates of COVID-19 Therapy by Demographics in 2022

**eTable 6.** Rates of COVID-19 Therapy by Demographics Among the Unvaccinated in 2022

**eTable 7.** Rates of COVID-19 Therapy by Demographics Among the Aged 65 Years and Over in 2022

**eTable 8.** Rates of Oral COVID-19 Therapy by Basic Demographics Among Medicare Advantage and Traditional Medicare in 2022

**eTable 9.** Rates of COVID-19 Therapies and Other Services by Severity Risk Quintile

**eTable 10.** Impact of Further Adjustment for Hospital Region or Primary Care Practice on Adjusted Effect Sizes

**eFigure.** Hospitalizations and Mortality Prevent With Counterfactual Redistribution of Nirmatrelvir in 2022

This supplemental material has been provided by the authors to give readers additional information about their work.

## eMethods 1. Therapy, testing, and vaccination codes

**eMethods Table A.** NDC codes used to identify oral COVID-19 therapies nirmatrelvir and molnupiravir in the part D event files

| NDC         | Name                       | Package Description                     | Claims (n) in 2022 |
|-------------|----------------------------|-----------------------------------------|--------------------|
| 00069108530 | nirmatrelvir and ritonavir | 5 blister pack in 1 carton              | 1,273,292          |
| 00069034530 | nirmatrelvir and ritonavir | 5 blister pack in 1 carton              | 427,532            |
| 00069110120 | nirmatrelvir and ritonavir | 5 blister pack in 1 carton              | 187,102            |
| 00069108506 | nirmatrelvir and ritonavir | 1 kit in 1 blister pack                 | 2,544              |
| 00069034506 | nirmatrelvir and ritonavir | 1 kit in 1 blister pack                 | 558                |
| 00069110104 | nirmatrelvir and ritonavir | 1 kit in 1 blister pack                 | 318                |
| 00069208501 | nirmatrelvir and ritonavir | 4 tablet, film coated in 1 blister pack | N/A                |
| 00069134501 | nirmatrelvir and ritonavir | 2 tablet, film coated in 1 blister pack | N/A                |
| 00069208502 | nirmatrelvir and ritonavir | 2 tablet, film coated in 1 blister pack | N/A                |
| 00069308501 | nirmatrelvir and ritonavir | 2 tablet in 1 blister pack              | N/A                |
| 00006505506 | molnupiravir               | 40 capsule in 1 bottle, plastic         | 273,790            |
| 00006505509 | molnupiravir               | 40 capsule in 1 bottle, plastic         | N/A                |
| 00006505507 | molnupiravir               | 40 capsule in 1 bottle, plastic         | N/A                |

**eMethods Table B.** CPT/HCPCS codes used to identify IV COVID-19 therapies in the Carrier and institutional revenue files

| CPT/HCPCS | Description                             | Claims (n), 2020-2022 |
|-----------|-----------------------------------------|-----------------------|
| M0239     | Bamlanivimab-xxxx infusion <sup>a</sup> | 132,380               |
| M0245     | Bamlan and etesev infusion              | 95,167                |
| M0246     | Bamlan and etesev infus home            | 1,791                 |
| Q0239     | Bamlanivimab-xxxx <sup>a</sup>          | 21,926                |
| Q0245     | Bamlanivimab and etesevima              | 26,457                |
| M0222     | Bebtelovimab injection                  | 148,512               |
| M0223     | Bebtelovimab injection home             | 9,646                 |
| Q0222     | Bebtelovimab 175 mg                     | 59,199                |
| M0240     | Casiri and imdev repeat                 | 6,234                 |
| M0241     | Casiri and imdev repeat hm              | 1,146                 |
| M0243     | Casirivi and imdevi inj                 | 456,590               |
| M0244     | Casirivi and imdevi inj hm              | 17,092                |
| Q0240     | Casirivi and imdevi 600mg               | 4,911                 |
| Q0243     | Casirivimab and imdevimab               | 31,643                |
| Q0244     | Casirivi and imdevi 1200 mg             | 61,385                |
| J0248     | remdesivir                              | 49,206                |
| M0247     | Sotrovimab infusion                     | 75,798                |
| M0248     | Sotrovimab inf, home admin              | 3,224                 |
| Q0247     | Sotrovimab                              | 24,312                |

<sup>a</sup> We believe bamlanivimab-xxxx refers to “monotherapy” (versus bamlanivimab with etesevimab)

**eMethods Table C. CPT/HCPCS codes used to identify molecular/antigen COVID-19 testing**

| CPT/HCPCS              | Description                                                          | Claims (n), 2020-2022 |
|------------------------|----------------------------------------------------------------------|-----------------------|
| <u>Molecular Tests</u> |                                                                      |                       |
| U0001                  | 2019-ncov diagnostic p                                               | 56,536                |
| U0002                  | covid-19 lab test non-cdc                                            | 948,730               |
| U0003                  | cov-19 amp prb hgh thrupt                                            | 10,729,948            |
| U0004                  | cov-19 test non-cdc hgh thru                                         | 3,041,703             |
| U0005                  | infec agen detec ampli probe                                         | 11,845,690            |
| 0202U                  | nfct ds 22 trgt sars-cov-2                                           | 157,031               |
| 0223U                  | nfct ds 22 trgt sars-cov-2                                           | 3,980                 |
| 0225U                  | nfct ds dna&rna 21 sarscov2                                          | 7,106                 |
| 0240U                  | nfct ds vir resp rna 3 trgt                                          | 86,990                |
| 0241U                  | nfct ds vir resp rna 4 trgt                                          | 822,717               |
| 87635                  | sars-cov-2 covid-19 amp prb                                          | 2,598,684             |
| 87636                  | sarscov2 & inf a&b amp prb                                           | 703,549               |
| 87637                  | sarscov2&inf a&b&rsv amp prb                                         | 313,849               |
| D0606                  | molecular testing for a public health related pathogen (dental code) | N/A                   |
| <u>Antigen Tests</u>   |                                                                      |                       |
| 87426                  | sarscov coronavirus ag ia                                            | 2,955,963             |
| 87428                  | sarscov & inf vir a&b ag ia                                          | 611,330               |
| 87811                  | sars-cov-2 covid19 w/optic                                           | 1,029,341             |
| D0604                  | antigen testing for any public health related pathogen (dental code) | N/A                   |

**eMethods Table D. CPT/HCPCS codes used to identify COVID-19 vaccinations**

| CPT/HCPCS | Description                                                                                                                      | Claims (n), 2020-2022 |
|-----------|----------------------------------------------------------------------------------------------------------------------------------|-----------------------|
| 91302     | AstraZeneca Covid-19 Vaccine                                                                                                     | < 11                  |
| 0021A     | AstraZeneca Covid-19 Vaccine Administration – First Dose                                                                         | < 11                  |
| 0022A     | AstraZeneca Covid-19 Vaccine Administration – Second Dose                                                                        | 43                    |
| M0201     | COVID-19 vaccine home admin                                                                                                      | 271,317               |
| 91303     | Janssen Covid-19 Vaccine (Aged 18 years and older)[3]                                                                            | 101,863               |
| 0031A     | Janssen Covid-19 Vaccine Administration - First Dose[3]                                                                          | 1,483,205             |
| 0034A     | Janssen Covid-19 Vaccine Administration - Booster[3]                                                                             | 143,901               |
| 91301     | Moderna Covid-19 Vaccine (Aged 12 years and older) (Red Cap)                                                                     | 1,738,582             |
| 91306     | Moderna Covid-19 Vaccine (Aged 18 years and older) (Red Cap) (Low Dose)                                                          | 276,133               |
| 91309     | Moderna Covid-19 Vaccine (Aged 6 years through 11 years or aged 18 years and older) (Blue Cap with purple border) 50MCG/0.5ML[5] | 7,992                 |
| 91311     | Moderna Covid-19 Pediatric Vaccine (Aged 6 months through 5 years) (Blue Cap with magenta border) 250MCG/0.25ML                  | 26                    |

|       |                                                                                                                                   |            |
|-------|-----------------------------------------------------------------------------------------------------------------------------------|------------|
| 91313 | Moderna COVID-19 Vaccine, Bivalent Product (Aged 12 years and older) (Dark Blue Cap with gray border)[6]                          | 123,069    |
| 91314 | Moderna COVID-19 Vaccine, Bivalent Product (Aged 6 years through 11 years) (Dark Blue Cap with gray border)                       | 128        |
| 0011A | Moderna Covid-19 Vaccine (Red Cap) Administration – First Dose                                                                    | 12,271,347 |
| 0012A | Moderna Covid-19 Vaccine (Red Cap) Administration – Second Dose                                                                   | 11,575,825 |
| 0013A | Moderna Covid-19 Vaccine (Red Cap) Administration – Third Dose                                                                    | 3,428,726  |
| 0064A | Moderna Covid-19 Vaccine (Red Cap) (Low Dose) Administration - Booster                                                            | 12,745,799 |
| 0091A | Moderna Covid-19 Pediatric Vaccine (Aged 6 years through 11 years) (Blue Cap with purple border) Administration - First dose      | 115        |
| 0092A | Moderna Covid-19 Pediatric Vaccine (Aged 6 years through 11 years) (Blue Cap with purple border) Administration - Second dose     | 12         |
| 0093A | Moderna Covid-19 Pediatric Vaccine (Aged 6 years through 11 years) (Blue Cap with purple border) Administration - Third dose      | 100        |
| 0094A | Moderna Covid-19 Vaccine (Aged 18 years and older) (Blue Cap with purple border) 50MCG/0.5ML Administration - Booster             | 46,977     |
| 0111A | Moderna Covid-19 Pediatric Vaccine (Aged 6 months through 5 years) (Blue Cap with magenta border) Administration - First dose     | 17         |
| 0112A | Moderna Covid-19 Pediatric Vaccine (Aged 6 months through 5 years) (Blue Cap with magenta border) Administration - Second dose    | 23         |
| 0113A | Moderna Covid-19 Pediatric Vaccine (Aged 6 months through 5 years) (Blue Cap with magenta border) Administration - Third dose     | 29         |
| 0134A | Moderna COVID-19 Vaccine, Bivalent (Aged 12 years and older) (Dark Blue Cap with gray border) Administration – Booster Dose[6]    | 3,485,308  |
| 0144A | Moderna COVID-19 Vaccine, Bivalent (Aged 6 years through 11 years) (Dark Blue Cap with gray border) Administration – Booster Dose | 570        |
| 91304 | Novavax Covid-19 Vaccine, Adjuvanted (Aged 12 years and older)                                                                    | 331        |
| 0041A | Novavax Covid-19 Vaccine, Adjuvanted Administration – First Dose                                                                  | 1,789      |
| 0042A | Novavax Covid-19 Vaccine, Adjuvanted Administration – Second Dose                                                                 | 983        |
| 0044A | Novavax Covid-19 Vaccine, Adjuvanted Administration - Booster                                                                     | 559        |
| 91300 | Pfizer-BioNTech Covid-19 Vaccine (Aged 12 years and older) (Purple Cap)                                                           | 1,893,174  |
| 91305 | Pfizer-BioNTech Covid-19 Vaccine Pre-Diluted (Aged 12 years and older) (Gray Cap)                                                 | 97,642     |
| 91307 | Pfizer-BioNTech Covid-19 Pediatric Vaccine (Aged 5 years through 11 years) (Orange Cap)                                           | 202        |
| 91308 | Pfizer-BioNTech Covid-19 Pediatric Vaccine (Aged 6 months through 4 years) (Maroon Cap)                                           | 12         |
| 91312 | Pfizer-BioNTech COVID-19 Vaccine, Bivalent Product (Aged 12 years and older) (Gray Cap)                                           | 188,154    |
| 91315 | Pfizer-BioNTech COVID-19 Vaccine, Bivalent Product (Aged 5 years through 11 years) (Orange Cap)                                   | 86         |
| 0001A | Pfizer-BioNTech Covid-19 Vaccine (Purple Cap) Administration – First Dose                                                         | 12,634,252 |

|       |                                                                                                                               |            |
|-------|-------------------------------------------------------------------------------------------------------------------------------|------------|
| 0002A | Pfizer-BioNTech Covid-19 Vaccine (Purple Cap) Administration – Second Dose                                                    | 11,997,243 |
| 0003A | Pfizer-BioNTech Covid-19 Vaccine (Purple Cap) Administration – Third Dose                                                     | 4,839,851  |
| 0004A | Pfizer-BioNTech Covid-19 Vaccine (Purple Cap) Administration – Booster                                                        | 8,312,146  |
| 0051A | Pfizer-BioNTech Covid-19 Vaccine Pre-Diluted (Gray Cap) Administration - First dose                                           | 1,072,652  |
| 0052A | Pfizer-BioNTech Covid-19 Vaccine Pre-Diluted (Gray Cap) Administration - Second dose                                          | 65,659     |
| 0053A | Pfizer-BioNTech Covid-19 Vaccine Pre-Diluted (Gray Cap) Administration - Third dose                                           | 171,309    |
| 0054A | Pfizer-BioNTech Covid-19 Vaccine Pre-Diluted (Gray Cap) Administration - Booster                                              | 2,347,252  |
| 0071A | Pfizer-BioNTech Covid-19 Pediatric Vaccine (Orange Cap) Administration - First dose                                           | 462        |
| 0072A | Pfizer-BioNTech Covid-19 Pediatric Vaccine (Orange Cap) Administration - Second dose                                          | 257        |
| 0073A | Pfizer-BioNTech Covid-19 Pediatric Vaccine (Orange Cap) Administration - Third dose                                           | 136        |
| 0074A | Pfizer-BioNTech Covid-19 Pediatric Vaccine (Orange Cap) Administration - Booster                                              | 265        |
| 0081A | Pfizer-BioNTech Covid-19 Pediatric Vaccine (Aged 6 months through 4 years) (Maroon Cap) Administration - First dose           | 33         |
| 0082A | Pfizer-BioNTech Covid-19 Pediatric Vaccine (Aged 6 months through 4 years) (Maroon Cap) Administration - Second dose          | 18         |
| 0083A | Pfizer-BioNTech Covid-19 Pediatric Vaccine (Aged 6 months through 4 years) (Maroon Cap) Administration - Third dose           | 23         |
| 0124A | Pfizer-BioNTech COVID-19 Vaccine, Bivalent (Gray Cap) Administration – Booster Dose                                           | 4,920,886  |
| 0154A | Pfizer-BioNTech COVID-19 Vaccine, Bivalent Product (Aged 5 years through 11 years) (Orange Cap) Administration – Booster Dose | 535        |

## eMethods 2. Model specification

### *Adjusted Odds-Ratios*

Adjusted odds ratios shown in Figure 2 and reported in eTables 2 and 5 were estimated using logistic regression with clustered standard errors at the hospital referral region level (based on beneficiary residence zip).

Model specification was the following

$$Outcome_i = \beta_0 + X_i\tau + \varepsilon_i$$

- $Outcome_i$  is the outcome for beneficiary  $i$
- $\varepsilon_i$  is the error with hospital referral region level clustering
- $X_i$  are beneficiary characteristics:
  - Age indicators (<40, 40-49, 50-59, 60-64, 65-69, 70-74, 75-79, 80-84, 85-89, and 90+) as of January 1 2022
  - Female indicator
  - Race/ethnicity indicators (Asian, black, Hispanic, non-white, and other (American Indian, Pacific Islander, multi race or unknown))
  - Metro residence indicator set equal to 1 if the bene’s residence Zip code is located within Rural-Urban Commuting Areas (RUCAs) 1-3 (i.e., metropolitan area or “urban”), and 0 otherwise (i.e., non-metropolitan area or “rural”)
  - Medicaid eligibility status (dual eligible or not) in any month of 2022
  - Original entitlement reason indicators (age 65+, disability or end-stage renal disease)
  - Nursing home resident indicator set equal to 1 for any short or long-term nursing home day in 2022, and 0 otherwise (i.e., community resident)
  - Count of 27 chronic condition indicators (No information, 0, 1-3, 4-5, 6-9, and 10+)
    - Conditions were counted if they were identified prior to the start of the 2022 and each was coded as 1 if beneficiary  $i$  had it and 0 otherwise
    - We included an indicator for patients without chronic condition information
    - For those with information, conditions included: Alzheimer’s disease, Alzheimer’s disease and related disorders or senile dementia, anemia, asthma, atrial fibrillation, benign prostatic hyperplasia, breast cancer, cataract, chronic kidney disease, chronic obstructive pulmonary disease, colorectal cancer, depression, diabetes, endometrial cancer, glaucoma, heart failure, hip or pelvic fracture, hyperlipidemia, hypertension, hypothyroidism, ischemic heart disease, lung cancer, osteoporosis, prostate cancer, acute myocardial infarction, rheumatoid arthritis, and stroke or transient ischemic attack.

- Vaccination status indicator set equal to 1 for beneficiaries with at least 1 COVID-19 vaccine claim (see Methods Table D for codes) over the period 2020-2022, and 0 otherwise.
- Indicators for contraindication level for Nirmatrelvir (i.e., Paxlovid),
  - Level 1, no contraindication (“none”) or those with no history of liver/kidney disease, and no drug-drug interactions (Methods Table E)
  - Level 2, moderate contraindication or those with any tier 1 interactions (drugs listed in the monitor, adjust, or temporarily suspend concurrent medication sections of Methods Table E) and/or liver/kidney disease
  - Level 3, severe contraindication or those with any tier 2 drug interactions (drugs listed in the prescribe alternative COVID-19 therapy section of Methods Table E)

#### *Geographic or Attributed Primary Care Practice Adjusted Models*

We examined the effect of adding fixed effects for hospital referral region (HRR) or primary care practice (indexed by  $j$ ) to a baseline linear regression model of any therapy use on beneficiary  $i$  characteristics. Baseline unadjusted effects, those with control variables added but without the addition of fixed effects, and each fixed effect model (HRR or practice) are provided in eTable 9 below. We also provide the % change of each coefficient from the fixed effect models compared to the adjusted model coefficients without fixed effects.

Model specification was the following

$$AnyTherapyUse_{ij} = \beta_0 + \delta_j + X_i\tau + \varepsilon_{ij}$$

- $AnyTherapyUse_{ij}$  is an indicator equal to 1 if beneficiary  $i$  used an oral or IV therapy in 2022
- $\varepsilon_{ij}$  is the error with hospital referral region level clustering
- $X_i$  are beneficiary characteristics (described above)
- $\delta_j$  is a fixed effect for beneficiary hospital referral region or attributed primary care practice (see eMethods 3 below for details on attribution)

#### *Severity Risk Model*

We defined a prognostic score for mortality within 21 days of a COVID-19 diagnosis (“COVID-19 severity risk”) by counting up the incremental 21 day mortality probability associated with each patient characteristic. Expectations were the product of having a given characteristic and that characteristics’ coefficient from a linear regression model of 21 day mortality fitted on a sample of patients diagnosed with COVID-19 in 2021. We limited our sample to beneficiaries with at least 180 days of continuous parts A/B enrollment prior to diagnosis through up to 21 days after. Beneficiaries enrolled in a Medicare Advantage plan during this period were not included. We also required beneficiaries to be continuously enrolled in part D Medicare in the 21 days before and after diagnosis to make them more comparable to our 2022 study sample (which we required to have 12 months of Part D coverage in 2022).

To better capture new incidence of COVID-19 (as opposed to documenting or treating prior infections) we limited our sample to COVID-19 cases that did not have any preceding COVID-19 diagnoses in the prior 180 days, and among those only kept cases with a primary

diagnosis for COVID-19. After making these restrictions, our sample included 1,170,947 COVID-19 cases from January 1 2021 through December 31 2021.

Using this sample, we employed the following model specification to generate the coefficients we used to calculate beneficiary risk scores in 2022.

Model specification was the following:

$$21dayMortality_i = \beta_0 + X_i\tau + \varepsilon_i$$

- $21dayMortality_i$  is a dichotomous indicator for whether or not patient  $i$  died within 21 days of their COVID-19 diagnosis from any cause (i.e., all-cause 21 day mortality)
- $\beta_0$  is a constant
- $\varepsilon_i$  is random error
- $X_i$  are beneficiary demographics, including:
  - Age indicators (<40, 40-49, 50-59, 60-64, 65-69, 70-74, 75-79, 80-84, 85-89, and 90+) as of diagnosis date
  - Female indicator
  - Race/ethnicity indicators (Asian, black, Hispanic, non-white, and other (American Indian, Pacific Islander, multi race or unknown))
  - Metro residence indicator set equal to 1 if the bene’s residence Zip code is located within Rural-Urban Commuting Areas (RUCAs) 1-3 (i.e., metropolitan area or “urban”), and 0 otherwise (i.e., non-metropolitan area or “rural”)
  - Medicaid eligibility status (dual eligible or not) in any month 1 year prior to diagnosis
  - Original entitlement reason indicators (age 65+, disability or end-stage renal disease)
  - 27 chronic condition indicators
    - Conditions were included if they were identified prior to the start of the 2021 and each was coded as 1 if beneficiary  $i$  had it and 0 otherwise
    - We included an indicator for patients without chronic condition information
    - For those with information, conditions included: Alzheimer’s disease, Alzheimer’s disease and related disorders or senile dementia, anemia, asthma, atrial fibrillation, benign prostatic hyperplasia, breast cancer, cataract, chronic kidney disease, chronic obstructive pulmonary disease, colorectal cancer, depression, diabetes, endometrial cancer, glaucoma, heart failure, hip or pelvic fracture, hyperlipidemia, hypertension, hypothyroidism, ischemic heart disease, lung cancer, osteoporosis, prostate cancer, acute myocardial infarction, rheumatoid arthritis, and stroke or transient ischemic attack.
  - Vaccination status indicator set equal to 1 for beneficiaries with at least 1 COVID-19 vaccine claim (see Methods Table D for codes) prior to their COVID-19 diagnosis date, and 0 otherwise.
  - 37 other CCW Condition Indicators
    - Conditions were included if they were identified prior to the start of the 2021 and each was coded as 1 if beneficiary  $i$  had it and 0 otherwise



- Conditions included: ADHD/ Conduct Disorders/ Hyperkinetic Syndrome, Alcohol Use Disorders, Anxiety Disorders, Autism Spectrum Disorders, Bipolar Disorder, Traumatic Brain Injury/ Brain Damage Disorders, Cerebral Palsy, Cystic Fibrosis/Metabolic Developmental Disorders, Depressive Disorders, Drug Use Disorders, Epilepsy, Fibromyalgia/Chronic Pain/Fatigue, Deafness /Hearing Impairment, Viral Hepatitis, HIV/AIDS, Intellectual Disabilities, Learning Disabilities, Leukemias/Lymphomas, Liver Disease/Cirrhosis/Other Liver Conditions, Migraine/Chronic Headache, Mobility Impairments, Multiple Sclerosis/Transverse Myelitis, Muscular Dystrophy, Obesity, Other Developmental Delays, Opioid Use Disorder, Personality Disorders, Post-Traumatic Stress Disorder, Peripheral Vascular Disease, Sickle Cell Disease, Schizophrenia, Schizophrenia/Other Psychotic Disorders, Spina Bifida/Other Congenital Nervous System Anomalies, Spinal Cord Injury, Tobacco Use, Ulcers, Blindness/Visual Impairment.

**eTable 1** contains the coefficients we estimated to predict severity risk. The C-statistic for our model (obtained via the area under the ROC, non-parametrically) was 0.75.

### eMethods 3. Primary care practice attribution and nirmatrelvir contraindications

#### *Primary Care Attribution*

We identified 2020-2021 primary care visits in the part B Carrier claim files as E&M visits (using the BETOS E&M grouper of CPT/HCPCS codes) delivered by a physician with a provider specialty code for general practice, internal medicine, family medicine, osteopathic therapist, pediatric medicine, geriatric medicine, or advanced nursing practice.

We considered tax identification numbers (TINs) to be “practices”, and we attributed beneficiaries to the practice that accounted for the plurality of primary care E&M visits in a prior year. First, we assigned beneficiaries to the plurality practice based on their primary care E&M visits in 2021. If the beneficiary did not have at least 1 primary care visit from 2021 from which to make the assignment, we then assigned based on their visits in 2020. For beneficiaries in our 2022 sample that remained unassigned (13.7% of total), we grouped them under their 5-digit residential zip code as their assigned practice.

#### *Contraindication Levels for Nirmatrelvir*

As described in the Methods, nirmatrelvir has multiple potential contraindications, including specific clinical conditions (kidney or liver disease) or drug-drug interactions, and these contraindications could be a major impediment to its use.<sup>25</sup> Using treatment guidelines,<sup>26</sup> we identified two tiers of drug safety risk for nirmatrelvir: tier 1 drugs, which need to be closely monitored or those that require dosage adjustment; and tier 2 drugs, which are contraindicated and must be held if nirmatrelvir is prescribed.

For each beneficiary we identified

- Prior history of kidney or liver disease using their CCW chronic and other conditions indicators for chronic kidney disease and Liver Disease/Cirrhosis/Other Liver Conditions
- And, whether they filled prescriptions with ingredient believed to cause an adverse interaction with nirmatrelvir
  - o For which, we searched their part D event histories from October 2021 through December 2022 to see if they ever had NDC codes linked to one of the ingredients listed in Methods Table E below

| <b>Contraindication Level</b> | <b>Interaction Tier</b> | <b>Description</b>                     | <b>Liver/Kidney Disease</b>           |
|-------------------------------|-------------------------|----------------------------------------|---------------------------------------|
| 1: None                       | No interactions         | --                                     | No prior history                      |
| 2: Moderate                   | Tier 1                  | Monitor for adverse effects            | Has prior history                     |
|                               |                         | Adjust dose and monitor                |                                       |
|                               |                         | Temporarily withhold                   |                                       |
| 3: Severe                     | Tier 2                  | Prescribe alternative COVID-19 therapy | No prior history or Has prior history |

Then, we assigned each beneficiary to one of three contraindication levels described in the grid above based on their history of prescription fills and kidney/liver disease. For the interaction

tiers, we obtained from treatment guidelines<sup>26</sup> the names of generic ingredients in each tier and identified the NDC codes that fell under each ingredient using the part D drug characteristic file. eMethods Table E describes the number of NDCs we were able to find under each generic ingredient name. Some ingredients such as dihydroergocornine did not correspond to any NDCs but we include them in the table to accurately describe our search.

**eMethods Table E.** Ingredients and unique National Drug Codes (NDCs) in the Part D Drug Characteristics File

| <b>Prescribe Alternative COVID-19 Therapy</b>                                 |                                                                   |        |
|-------------------------------------------------------------------------------|-------------------------------------------------------------------|--------|
| Medication Name                                                               | Generic Ingredient Name (GNN) in Part D Drug Characteristics File | # NDCs |
| AMIODARONE                                                                    | AMIODARONE HCL                                                    | 48     |
| BOSENTAN                                                                      | BOSENTAN                                                          | 18     |
| BROMOCRIPTINE                                                                 | BROMOCRIPTINE MESYLATE                                            | 17     |
| CARBAMAZEPINE                                                                 | CARBAMAZEPINE                                                     | 72     |
| CLOPIDOGREL                                                                   | CLOPIDOGREL BISULFATE                                             | 73     |
| CLOZAPINE                                                                     | CLOZAPINE                                                         | 97     |
| DIHYDROERGOCORNINE                                                            |                                                                   | 0      |
| DIHYDROERGOCRISTINE                                                           |                                                                   | 0      |
| DIHYDROERGOCRYPTINE                                                           |                                                                   | 0      |
| DIHYDROERGOTAMINE                                                             |                                                                   |        |
| ERGOTAMINE                                                                    | DIHYDROERGOTAMINE MESYLATE                                        | 12     |
| DISOPYRAMIDE                                                                  | DISOPYRAMIDE PHOSPHATE                                            | 13     |
| DOFETILIDE                                                                    | DOFETILIDE                                                        | 37     |
| DRONEDARONE                                                                   | DRONEDARONE HCL                                                   | 2      |
| EPLERENONE                                                                    | EPLERENONE                                                        | 30     |
| ERGONOVINE                                                                    | METHYLERGONOVINE MALEATE                                          | 10     |
| ERGOTAMINE                                                                    | ERGOTAMINE TARTRATE/CAFFEINE                                      | 5      |
| FLECAINIDE                                                                    | FLECAINIDE ACETATE                                                | 34     |
| GLECAPREVIR PIBRENTASVIR                                                      | GLECAPREVIR/PIBRENTASVIR                                          | 2      |
| IMACAFTOR                                                                     |                                                                   | 0      |
| IVABRADINE                                                                    | IVABRADINE HCL                                                    | 3      |
| IVACAFTOR LUMACAFTOR                                                          | LUMACAFTOR/IVACAFTOR                                              | 1      |
| LURASIDONE                                                                    | LURASIDONE HCL                                                    | 11     |
| METHYSERGIDE                                                                  |                                                                   | 0      |
| MIDAZOLAM                                                                     | MIDAZOLAM HCL                                                     | 47     |
| PERGOLIDE                                                                     |                                                                   | 0      |
| PHENOBARBITAL                                                                 | PHENOBARBITAL                                                     | 107    |
| PHENYTOIN                                                                     | FOSPHENYTOIN SODIUM                                               | 69     |
| PIMOZIDE                                                                      | PIMOZIDE                                                          | 2      |
| PRIMIDONE                                                                     | PRIMIDONE                                                         | 31     |
| PROPAFENONE                                                                   | PROPAFENONE HCL                                                   | 54     |
| QUINIDINE                                                                     | DEXTROMETHORPHAN HBR/QUINIDINE                                    | 5      |
| RIFAMPIN                                                                      | RIFAMPIN                                                          | 30     |
| RIFAPENTINE                                                                   | RIFAPENTINE                                                       | 3      |
| SILDENAFIL                                                                    | SILDENAFIL CITRATE                                                | 85     |
| TADALAFIL                                                                     | TADALAFIL                                                         | 114    |
| VARDENAFIL                                                                    | VARDENAFIL HCL                                                    | 13     |
| VOCLOSPORIN                                                                   |                                                                   | 0      |
| <b>Temporarily Withhold Concomitant Medication, if Clinically Appropriate</b> |                                                                   |        |
| Medication Name                                                               | GNN in Part D Drug Characteristics File                           | # NDCs |
| ALFUZOSIN                                                                     | ALFUZOSIN HCL                                                     | 19     |
| ALISKIREN                                                                     | ALISKIREN/HYDROCHLOROTHIAZIDE                                     | 10     |
| AMLODIPINE ATORVASTATIN                                                       | AMLODIPINE/ATORVASTATIN                                           | 55     |
| ATORVASTATIN                                                                  | ATORVASTATIN CALCIUM                                              | 245    |
| AVANAFIL                                                                      | AVANAFIL                                                          | 1      |
| COLCHICINE                                                                    | COLCHICINE                                                        | 36     |
| ELETRIPTAN                                                                    | ELETRIPTAN HYDROBROMIDE                                           | 21     |
| ERYTHROMYCIN                                                                  | ERYTHROMYCIN BASE                                                 | 86     |

|                                                                           |                                                |               |
|---------------------------------------------------------------------------|------------------------------------------------|---------------|
| EVEROLIMUS                                                                | EVEROLIMUS                                     | 33            |
| FINERENONE                                                                |                                                | 0             |
| FLIBANSERIN                                                               |                                                | 0             |
| LOMITAPIDE                                                                | LOMITAPIDE MESYLATE                            | 5             |
| LOVASTATIN                                                                | LOVASTATIN                                     | 64            |
| NALOXEGOL                                                                 | NALOXEGOL OXALATE                              | 6             |
| RANOLAZINE                                                                | RANOLAZINE                                     | 27            |
| RIMEGEPANT                                                                | RIMEGEPANT SULFATE                             | 1             |
| RIVAROXABAN                                                               | RIVAROXABAN                                    | 17            |
| ROSUVASTATIN                                                              | ROSUVASTATIN CALCIUM                           | 125           |
| SALMETEROL                                                                | SALMETEROL XINAFOATE                           | 29            |
| SILODOSIN                                                                 | SILODOSIN                                      | 30            |
| SIMVASTATIN                                                               | SIMVASTATIN                                    | 280           |
| SIROLIMUS                                                                 | SIROLIMUS                                      | 23            |
| SUVOREXANT                                                                | SUVOREXANT                                     | 8             |
| TACROLIMUS                                                                | TACROLIMUS                                     | 86            |
| TICAGRELOR                                                                | TICAGRELOR                                     | 3             |
| TRIAZOLAM                                                                 | TRIAZOLAM                                      | 10            |
| UBROGEPANT                                                                | UBROGEPANT                                     | 4             |
| VORAPAXAR                                                                 | VORAPAXAR SULFATE                              | 2             |
| <b>Adjust Concomitant Medication Dose and Monitor for Adverse Effects</b> |                                                |               |
| <b>Medication Name</b>                                                    | <b>GNN in Part D Drug Characteristics File</b> | <b># NDCs</b> |
| ALMOTRIPTAN                                                               | ALMOTRIPTAN MALATE                             | 6             |
| ALPRAZOLAM                                                                | ALPRAZOLAM                                     | 111           |
| APIXABAN                                                                  | APIXABAN                                       | 6             |
| ARIPIPRAZOLE                                                              | ARIPIPRAZOLE                                   | 219           |
| BREXIPRAZOLE                                                              |                                                | 0             |
| BUSPIRONE                                                                 | BUSPIRONE HCL                                  | 138           |
| CARIPRAZINE                                                               | CARIPRAZINE HCL                                | 9             |
| CHLORDIAZEPOXIDE                                                          | CHLORDIAZEPOXIDE HCL                           | 23            |
| CILOSTAZOL                                                                | CILOSTAZOL                                     | 17            |
| CLARITHROMYCIN                                                            | CLARITHROMYCIN                                 | 22            |
| CLOBAZAM                                                                  | CLOBAZAM                                       | 45            |
| CLONAZEPAM                                                                | CLONAZEPAM                                     | 106           |
| CLORAZEPATE                                                               | CLORAZEPATE DIPOTASSIUM                        | 11            |
| CYCLOSPORINE                                                              | CYCLOSPORINE, MODIFIED                         | 39            |
| DABIGATRAN                                                                | DABIGATRAN ETEXILATE MESYLATE                  | 10            |
| DARIFENACIN                                                               | DARIFENACIN HYDROBROMIDE                       | 29            |
| DEXAMETHASONE                                                             | DEXAMETHASONE                                  | 98            |
| DIAZEPAM                                                                  | DIAZEPAM                                       | 66            |
| DIGOXIN                                                                   | DIGOXIN                                        | 62            |
| EDOXABAN                                                                  | EDOXABAN TOSYLATE                              | 7             |
| ELEXACAFITOR TEZACAFITOR                                                  | ELEXACAFITOR/TEZACAFITOR/IVACAFIT              | 1             |
| ELUXADOLINE                                                               | ELUXADOLINE                                    | 2             |
| ESTAZOLAM                                                                 | ESTAZOLAM                                      | 4             |
| FEDRATINIB                                                                | FEDRATINIB DIHYDROCHLORIDE                     | 1             |
| FENTANYL                                                                  | FENTANYL                                       | 120           |
| FLURAZEPAM                                                                | FLURAZEPAM HCL                                 | 2             |
| HYDROCODONE                                                               | HYDROCODONE/ACETAMINOPHEN                      | 256           |
| ILOPERIDONE                                                               | ILOPERIDONE                                    | 8             |
| ITRACONAZOLE                                                              | ITRACONAZOLE                                   | 22            |
| IVACAFITOR                                                                | IVACAFITOR                                     | 2             |
| IVACAFITOR TEZACAFITOR                                                    | TEZACAFITOR/IVACAFITOR                         | 1             |
| KETOCONAZOLE                                                              | KETOCONAZOLE                                   | 44            |
| LUMATEPERONE                                                              | LUMATEPERONE TOSYLATE                          | 1             |

| MARAVIROC                                                              | MARAVIROC                               | 4      |
|------------------------------------------------------------------------|-----------------------------------------|--------|
| MEXILETINE                                                             | MEXILETINE HCL                          | 12     |
| OXYCODONE                                                              | OXYCODONE HCL/ACETAMINOPHEN             | 307    |
| PIMAVANSERIN                                                           | PIMAVANSERIN TARTRATE                   | 3      |
| QUETIAPINE                                                             | QUETIAPINE FUMARATE                     | 259    |
| RIFABUTIN                                                              | OMEPRAZOLE/AMOXICILL/RIFABUTIN          | 6      |
| RIOCIGUAT                                                              | RIOCIGUAT                               | 5      |
| RUXOLITINIB                                                            | RUXOLITINIB PHOSPHATE                   | 5      |
| SAXAGLIPTIN                                                            | SAXAGLIPTIN HCL/METFORMIN HCL           | 9      |
| SOLIFENACIN                                                            | SOLIFENACIN SUCCINATE                   | 74     |
| TAMSULOSIN                                                             | DUTASTERIDE/TAMSULOSIN HCL              | 51     |
| TOFACITINIB                                                            | TOFACITINIB CITRATE                     | 5      |
| TRAZODONE                                                              | TRAZODONE HCL                           | 89     |
| UPADACITINIB                                                           | UPADACITINIB                            | 1      |
| <b>Continue Concomitant Medication and Monitor for Adverse Effects</b> |                                         |        |
| Medication Name                                                        | GNN in Part D Drug Characteristics File | # NDCs |
| AMLODIPINE                                                             | AMLODIPINE BESYLATE                     | 342    |
| AMLODIPINE VALSARTAN                                                   | AMLODIPINE/VALSARTAN/HCTHIAZID          | 73     |
| BRINCIDOFOVIR                                                          |                                         | 0      |
| BUPRENORPHINE                                                          | BUPRENORPHINE                           | 132    |
| COBICISTAT                                                             | DARUNAVIR/COBICISTAT                    | 3      |
| DILTIAZEM                                                              | DILTIAZEM HCL                           | 259    |
| DOXAZOSIN                                                              | DOXAZOSIN MESYLATE                      | 80     |
| FELODIPINE                                                             | FELODIPINE                              | 49     |
| GLYBURIDE                                                              | GLYBURIDE                               | 78     |
| HALOPERIDOL                                                            | HALOPERIDOL                             | 125    |
| HYDROMORPHONE                                                          | HYDROMORPHONE HCL                       | 91     |
| HYDROXYZINE                                                            | HYDROXYZINE PAMOATE                     | 117    |
| ISAVUCONAZOLE                                                          |                                         | 0      |
| METHADONE                                                              | METHADONE HCL                           | 40     |
| MIRTAZAPINE                                                            | MIRTAZAPINE                             | 103    |
| MORPHINE                                                               | MORPHINE SULFATE                        | 187    |
| NIFEDIPINE                                                             | NIFEDIPINE                              | 79     |
| OXYBUTYNIN                                                             | OXYBUTYNIN CHLORIDE                     | 114    |
| POSACONAZOLE                                                           | POSACONAZOLE                            | 6      |
| RISPERIDONE                                                            | RISPERIDONE MICROSPHERES                | 174    |
| SACUBITRIL VALSARTAN                                                   | SACUBITRIL/VALSARTAN                    | 11     |
| TERAZOSIN                                                              | TERAZOSIN HCL                           | 39     |
| TRAMADOL                                                               | TRAMADOL HCL                            | 86     |
| VALSARTAN                                                              | VALSARTAN/HYDROCHLOROTHIAZIDE           | 139    |
| VERAPAMIL                                                              | TRANDOLAPRIL/VERAPAMIL HCL              | 92     |
| VORICONAZOLE                                                           | VORICONAZOLE                            | 40     |
| WARFARIN                                                               | WARFARIN SODIUM                         | 205    |
| ZIPRASIDONE                                                            | ZIPRASIDONE HCL                         | 70     |
| ZOLMITRIPTAN                                                           | ZOLMITRIPTAN                            | 35     |
| ZOLPIDEM                                                               | ZOLPIDEM TARTRATE                       | 65     |

Drug interactions defined using NIH treatment guidelines available at <https://www.covid19treatmentguidelines.nih.gov/therapies/antivirals-including-antibody-products/ritonavir-boosted-nirmatrelvir--paxlovid-/paxlovid-drug-drug-interactions/>

#### **eMethods 4.** Details on simulated reallocation of nirmatrelvir

##### *Specifying adverse events as a function of COVID-19 cases and treatments*

For any risk group  $k$ , we can express the number of adverse COVID-related events  $E$  (e.g., hospitalizations or deaths) in terms of the number of COVID-19 cases  $C$  and the number of treatments  $T$ :

$$E_k = (C_k - T_k) P(E_k | C_k) + T_k(1 - \sigma) P(E_k | C_k) \quad (1)$$

Here,  $P(E|C)$  is the probability that the event  $E$  occurs given a symptomatic COVID-19 case  $C$ , and  $\sigma$  is the treatment effectiveness (i.e., the proportion reduction in risk due to treatment). This equation states that the number of adverse events  $E$  is equal to (a) the number of untreated COVID-19 cases times the baseline probability that the event occurs given a case, plus (b) the number of treated COVID cases times the treatment-adjusted probability that the event occurs given a case.

##### *Accounting for imperfect ascertainment*

The total number of COVID-19 cases,  $C_k$ , is not directly observed. Because of this, it is necessary to adjust Equation (1) for imperfect case ascertainment. Let  $c_k$  (lowercase) denote the observed number of cases and  $a_k$  denote the ascertainment rate, so that

$$a_k C_k = c_k \quad (2)$$

Thus, we can re-write the Equation (1) as

$$E_k = (c_k/a_k - T_k) P(E_k | c_k, a_k) + T_k(1 - \sigma) P(E_k | c_k, a_k) \quad (3)$$

We can further simplify Equation (3):

$$E_k = P(E_k | c_k, a_k) [c_k/a_k - \sigma T_k] \quad (4)$$

Equation (4) now specifies the number of adverse outcomes  $E$  as a function of the observed cases  $c$ , the ascertainment rate  $a$ , the number of treatments  $T$ , and the treatment efficacy  $\sigma$ .

##### *Accounting for unknowns*

If we assume that we observe all treatments  $T$  and all adverse events  $E$ , we are left with two key unknowns:

- $a_k$ , the case ascertainment rate. This may vary across risk groups  $k$ .
- $\sigma$ , the treatment efficacy. We assume that this is constant across risk groups, though this assumption can be relaxed.

By making informed guesses about these values, it is possible to calculate  $P(E_k | c_k, a_k)$  (the risk of adverse outcomes) from the available data. For our analysis, we consider a range of ascertainment rates from 50% to 75%. We set the treatment efficacy based on literature values.

##### *Assessing different treatment distributions across risk groups*

With a slight adjustment to Equation (1), it is possible to estimate the number of adverse events that would have occurred with a different number of treatments:

$$\tilde{E}_k = P(E_k | c_k, a_k) [c_k/a_k - \sigma \tilde{T}_k] \quad (5)$$

Here,  $\tilde{T}_k$  is the counterfactual (adjusted) number of treatments in group  $k$  and  $\tilde{E}_k$  is the expected number of adverse events that would have occurred with  $\tilde{T}_k$  treatments.

We re-allocated treatments across groups in proportion to the estimated baseline (non-treatment) risk of adverse outcomes, so that the total number of treatments given is the same as the actual number of treatments given, but each risk group instead receives a share of those treatments in proportion to their baseline risk of adverse outcomes (hospitalization or death). In this scenario, the total number of treatments in the population remains constant. Because of this, outcomes may worsen for some risk groups if treatments are re-allocated from that group, due to lower baseline risk, and given instead to other, higher-risk groups.

For the present analysis, we considered treatment with nirmatrelvir. We assumed a  $\sigma = 40\%$  reduction in the risk of hospitalization and a  $\sigma = 70\%$  reduction in mortality risk. Using these values, we calculated the counterfactual change in adverse outcomes (hospitalizations or mortality) under the treatment redistribution scenarios outlined above, under a range of case ascertainment rates  $a$  from 50% to 75%.



**eTable 1.** Mortality following COVID-19 Diagnosis Risk Model Coefficients

|                                         | <b>Coef.</b> | <b>SE</b> | <b>P value</b> | <b>95% Confidence Interval</b> |              |
|-----------------------------------------|--------------|-----------|----------------|--------------------------------|--------------|
|                                         |              |           |                | <b>Lower</b>                   | <b>Upper</b> |
| <b>Patient Characteristics</b>          |              |           |                |                                |              |
| Age Less than 40                        | -0.0470      | 0.00152   | 0.0000         | -0.0500                        | -0.0440      |
| Age 40 to 49                            | -0.0370      | 0.00143   | 0.0000         | -0.0398                        | -0.0342      |
| Age 50 to 59                            | -0.0250      | 0.00116   | 0.0000         | -0.0273                        | -0.0227      |
| Age 60 to 64                            | -0.0111      | 0.00126   | 0.0000         | -0.0136                        | -0.0087      |
| Age 65 to 69                            | ref          |           |                |                                |              |
| Age 70 to 74                            | 0.0109       | 0.000691  | 0.0000         | 0.0095                         | 0.0122       |
| Age 75 to 79                            | 0.0267       | 0.000803  | 0.0000         | 0.0251                         | 0.0282       |
| Age 80 to 84                            | 0.0476       | 0.000933  | 0.0000         | 0.0458                         | 0.0494       |
| Age 85 to 89                            | 0.0811       | 0.0011    | 0.0000         | 0.0790                         | 0.0833       |
| Age 90 plus                             | 0.1280       | 0.00124   | 0.0000         | 0.1260                         | 0.1310       |
| Female                                  | -0.0196      | 0.000559  | 0.0000         | -0.0207                        | -0.0185      |
| Male                                    | ref          |           |                |                                |              |
| Asian                                   | 0.0108       | 0.0016    | 0.0000         | 0.0077                         | 0.0139       |
| Black                                   | 0.0021       | 0.000831  | 0.0104         | 0.0005                         | 0.0038       |
| Hispanic                                | 0.0078       | 0.000896  | 0.0000         | 0.0061                         | 0.0096       |
| White                                   | ref          |           |                |                                |              |
| Other Race                              | 0.0003       | 0.00121   | 0.8320         | -0.0021                        | 0.0026       |
| Urban Residence                         | ref          |           |                |                                |              |
| Rural Residence                         | 0.0055       | 0.000484  | 0.0000         | 0.0046                         | 0.0064       |
| Non-Dual                                | ref          |           |                |                                |              |
| Dual                                    | 0.0117       | 0.00059   | 0.0000         | 0.0106                         | 0.0129       |
| Entitlement Age                         | ref          |           |                |                                |              |
| Entitlement Disability                  | 0.0165       | 0.000748  | 0.0000         | 0.0150                         | 0.0179       |
| Entitlement ESRD                        | 0.0448       | 0.00193   | 0.0000         | 0.0410                         | 0.0485       |
| No Vaccination                          | ref          |           |                |                                |              |
| Vaccination                             | -0.0333      | 0.000457  | 0.0000         | -0.0342                        | -0.0324      |
| <b>CCW Chronic Condition Indicators</b> |              |           |                |                                |              |
| CCW No Info                             | 0.0009       | 0.00108   | 0.3850         | -0.0012                        | 0.0031       |
| Any Dementia                            | 0.0185       | 0.000811  | 0.0000         | 0.0169                         | 0.0201       |
| Alzheimer's                             | 0.0168       | 0.00116   | 0.0000         | 0.0145                         | 0.0191       |
| Acute Myocardial Infarction             | 0.0169       | 0.00105   | 0.0000         | 0.0148                         | 0.0190       |
| Anemia                                  | 0.0040       | 0.000533  | 0.0000         | 0.0029                         | 0.0050       |
| Asthma                                  | -0.0076      | 0.000623  | 0.0000         | -0.0088                        | -0.0064      |
| Atrial Fibrillation                     | 0.0042       | 0.000675  | 0.0000         | 0.0028                         | 0.0055       |
| Cataract                                | -0.0043      | 0.000534  | 0.0000         | -0.0054                        | -0.0033      |
| Cogestive Heart Failure                 | 0.0180       | 0.000614  | 0.0000         | 0.0167                         | 0.0192       |
| Chronic Kidney Disease                  | 0.0189       | 0.000542  | 0.0000         | 0.0178                         | 0.0199       |
| Endocrine Cancer                        | -0.0018      | 0.00221   | 0.4270         | -0.0061                        | 0.0026       |

|                                                      |         |          |        |         |         |
|------------------------------------------------------|---------|----------|--------|---------|---------|
| Breast Cancer                                        | -0.0041 | 0.00101  | 0.0000 | -0.0061 | -0.0022 |
| Colon Cancer                                         | 0.0021  | 0.00144  | 0.1450 | -0.0007 | 0.0049  |
| Lung Cancer                                          | 0.0263  | 0.00192  | 0.0000 | 0.0225  | 0.0300  |
| Prostate Cancer                                      | -0.0041 | 0.00107  | 0.0002 | -0.0062 | -0.0020 |
| Chronic Obstructive<br>Pulmonary Disease             | 0.0126  | 0.00058  | 0.0000 | 0.0114  | 0.0137  |
| Depression                                           | 0.0025  | 0.000817 | 0.0026 | 0.0009  | 0.0041  |
| Diabetes                                             | 0.0058  | 0.000529 | 0.0000 | 0.0047  | 0.0068  |
| Glaucoma                                             | -0.0048 | 0.000562 | 0.0000 | -0.0060 | -0.0037 |
| Hip Fracture                                         | 0.0120  | 0.00128  | 0.0000 | 0.0095  | 0.0145  |
| Hyperlipidemia                                       | -0.0080 | 0.000619 | 0.0000 | -0.0092 | -0.0068 |
| Benign Prostatic Hyperplasia                         | -0.0021 | 0.000701 | 0.0030 | -0.0035 | -0.0007 |
| Hypertension                                         | 0.0004  | 0.000639 | 0.4870 | -0.0008 | 0.0017  |
| Thyroid Disease                                      | -0.0010 | 0.000513 | 0.0598 | -0.0020 | 0.0000  |
| Ischemic Heart Disease                               | -0.0026 | 0.000549 | 0.0000 | -0.0037 | -0.0015 |
| Osteoporosis                                         | -0.0075 | 0.00063  | 0.0000 | -0.0087 | -0.0062 |
| Arthritis                                            | -0.0050 | 0.000538 | 0.0000 | -0.0061 | -0.0040 |
| Stroke                                               | 0.0016  | 0.000721 | 0.0227 | 0.0002  | 0.0031  |
| <b>Other CCW Condition<br/>Indicators</b>            |         | 0        |        |         |         |
| ADHD/ Conduct Disorders/<br>Hyperkinetic Syndrome    | -0.0040 | 0.00141  | 0.0043 | -0.0068 | -0.0013 |
| Alcohol Use Disorders                                | -0.0037 | 0.00111  | 0.0009 | -0.0059 | -0.0015 |
| Anxiety Disorders                                    | -0.0024 | 0.000576 | 0.0000 | -0.0036 | -0.0013 |
| Autism Spectrum Disorders                            | -0.0013 | 0.00289  | 0.6600 | -0.0069 | 0.0044  |
| Bipolar Disorder                                     | -0.0039 | 0.000987 | 0.0001 | -0.0059 | -0.0020 |
| Traumatic Brain Injury/ Brain<br>Damage Disorders    | -0.0041 | 0.00177  | 0.0215 | -0.0075 | -0.0006 |
| Cerebral Palsy                                       | -0.0062 | 0.00249  | 0.0127 | -0.0111 | -0.0013 |
| Cystic Fibrosis/Metabolic<br>Developmental Disorders | -0.0044 | 0.00134  | 0.0010 | -0.0071 | -0.0018 |
| Depressive Disorders                                 | -0.0015 | 0.000861 | 0.0736 | -0.0032 | 0.0001  |
| Drug Use Disorders                                   | -0.0019 | 0.0011   | 0.0916 | -0.0040 | 0.0003  |
| Epilepsy                                             | 0.0013  | 0.00105  | 0.2100 | -0.0007 | 0.0034  |
| Fibromyalgia/Chronic<br>Pain/Fatigue                 | -0.0059 | 0.000513 | 0.0000 | -0.0069 | -0.0049 |
| Deafness /Hearing Impairment                         | -0.0052 | 0.000644 | 0.0000 | -0.0064 | -0.0039 |
| Viral Hepatitis                                      | -0.0021 | 0.00144  | 0.1420 | -0.0050 | 0.0007  |
| HIV/AIDS                                             | -0.0139 | 0.00306  | 0.0000 | -0.0198 | -0.0079 |
| Intellectual Disabilities                            | 0.0052  | 0.00158  | 0.0011 | 0.0021  | 0.0083  |
| Learning Disabilities                                | 0.0020  | 0.00271  | 0.4540 | -0.0033 | 0.0074  |
| Leukemias/Lymphomas                                  | 0.0262  | 0.00137  | 0.0000 | 0.0236  | 0.0289  |
| Liver Disease/Cirrhosis/Other<br>Liver Conditions    | -0.0010 | 0.000684 | 0.1460 | -0.0023 | 0.0003  |
| Migraine/Chronic Headache                            | -0.0065 | 0.000801 | 0.0000 | -0.0081 | -0.0050 |
| Mobility Impairments                                 | 0.0071  | 0.00104  | 0.0000 | 0.0051  | 0.0092  |
| Multiple Sclerosis/Transverse<br>Myelitis            | 0.0012  | 0.00213  | 0.5690 | -0.0030 | 0.0054  |

|                                                        |           |          |        |         |         |
|--------------------------------------------------------|-----------|----------|--------|---------|---------|
| Muscular Dystrophy                                     | 0.0216    | 0.00595  | 0.0003 | 0.0099  | 0.0332  |
| Obesity                                                | 0.0076    | 0.000502 | 0.0000 | 0.0066  | 0.0086  |
| Other Developmental Delays                             | -0.0029   | 0.00293  | 0.3270 | -0.0086 | 0.0029  |
| Opioid Use Disorder                                    | 0.0044    | 0.00123  | 0.0003 | 0.0020  | 0.0068  |
| Personality Disorders                                  | -0.0049   | 0.00121  | 0.0000 | -0.0073 | -0.0026 |
| Post-Traumatic Stress Disorder                         | -0.0012   | 0.00145  | 0.4020 | -0.0041 | 0.0016  |
| Peripheral Vascular Disease                            | 0.0035    | 0.000603 | 0.0000 | 0.0023  | 0.0047  |
| Sickle Cell Disease                                    | 0.0012    | 0.00685  | 0.8610 | -0.0122 | 0.0146  |
| Schizophrenia                                          | -0.0158   | 0.00172  | 0.0000 | -0.0192 | -0.0125 |
| Schizophrenia/Other Psychotic Disorders                | 0.0032    | 0.00131  | 0.0147 | 0.0006  | 0.0058  |
| Spina Bifida/Other Congenital Nervous System Anomalies | -0.0040   | 0.00306  | 0.1910 | -0.0100 | 0.0020  |
| Spinal Cord Injury                                     | 0.0048    | 0.00174  | 0.0054 | 0.0014  | 0.0083  |
| Tobacco Use                                            | 0.0100    | 0.000685 | 0.0000 | 0.0087  | 0.0114  |
| Ulcers                                                 | 0.0189    | 0.000807 | 0.0000 | 0.0173  | 0.0205  |
| Blindness/Visual Impairment                            | 0.0121    | 0.00178  | 0.0000 | 0.0086  | 0.0156  |
| Constant                                               | 0.0367    | 0.0007   | 0.0000 | 0.0353  | 0.0382  |
| Observations                                           | 1,170,947 |          |        |         |         |
| R <sup>2</sup>                                         | 0.051     |          |        |         |         |

See eMethods 2 for description of the COVID-19 severity risk model above.

**eTable 2.** Rates of COVID-19 therapy by demographics among patients with a COVID-19 diagnosis in 2022

|                                            | Beneficiaries with COVID-19<br>N (col %) | Any COVID-19 Therapy |                        | Oral COVID-19 Therapy |                   | IV COVID-19 Therapy |                   |
|--------------------------------------------|------------------------------------------|----------------------|------------------------|-----------------------|-------------------|---------------------|-------------------|
|                                            |                                          | Row %                | Adj. OR (95% CI)       | Row %                 | Adj. OR (95% CI)  | Row %               | Adj. OR (95% CI)  |
| Total, No.                                 | 3,715,664                                | 23.0                 |                        | 18.1                  |                   | 5.2                 |                   |
| Age                                        | Under 40                                 | 1.7                  | 12.5 0.73 (0.70, 0.76) | 8.5                   | 0.66 (0.63, 0.68) | 4.1                 | 1.08 (0.99, 1.18) |
|                                            | 40-49                                    | 1.9                  | 15.1 0.87 (0.85, 0.90) | 10.5                  | 0.83 (0.81, 0.86) | 4.8                 | 1.07 (0.99, 1.15) |
|                                            | 50-59                                    | 3.5                  | 15.9 0.91 (0.89, 0.94) | 11.4                  | 0.91 (0.89, 0.94) | 4.7                 | 0.96 (0.92, 1.01) |
|                                            | 60-64                                    | 3.1                  | 17.1 0.93 (0.91, 0.95) | 12.5                  | 0.93 (0.91, 0.95) | 4.8                 | 0.96 (0.92, 1.01) |
|                                            | 65-69                                    | 24.0                 | 25.0 Ref               | 20.7                  | Ref               | 4.6                 | Ref               |
|                                            | 70-74                                    | 24.3                 | 25.5 1.00 (0.99, 1.01) | 20.6                  | 1.01 (1.00, 1.02) | 5.2                 | 0.97 (0.95, 0.99) |
|                                            | 75-79                                    | 17.9                 | 24.4 0.97 (0.96, 0.99) | 19.0                  | 0.98 (0.96, 1.00) | 5.7                 | 0.98 (0.95, 1.00) |
|                                            | 80-84                                    | 11.7                 | 22.7 0.98 (0.96, 1.00) | 16.9                  | 0.97 (0.94, 0.99) | 6.1                 | 1.03 (1.00, 1.06) |
|                                            | 85-89                                    | 6.9                  | 20.3 0.98 (0.95, 1.00) | 14.6                  | 0.95 (0.92, 0.98) | 6.0                 | 1.07 (1.04, 1.11) |
|                                            | 90+                                      | 5.0                  | 16.7 0.90 (0.88, 0.93) | 11.6                  | 0.87 (0.84, 0.90) | 5.3                 | 1.05 (1.00, 1.1)  |
| Sex                                        | Female                                   | 58.4                 | 22.7 0.98 (0.97, 0.99) | 18.0                  | 1 (0.99, 1.01)    | 4.9                 | 0.93 (0.92, 0.94) |
|                                            | Male                                     | 41.6                 | 23.5 Ref               | 18.2                  | Ref               | 5.6                 | Ref               |
| Race                                       | Asian                                    | 3.2                  | 22.1 0.96 (0.88, 1.05) | 19.4                  | 1.10 (1.00, 1.21) | 2.9                 | 0.58 (0.50, 0.67) |
|                                            | Black                                    | 5.9                  | 13.7 0.68 (0.66, 0.71) | 10.6                  | 0.74 (0.71, 0.76) | 3.2                 | 0.60 (0.56, 0.65) |
|                                            | Hispanic                                 | 5.2                  | 17.6 0.86 (0.81, 0.91) | 13.9                  | 0.93 (0.87, 0.99) | 3.9                 | 0.73 (0.62, 0.86) |
|                                            | White                                    | 81.9                 | 24.0 Ref               | 18.8                  | Ref               | 5.6                 | Ref               |
|                                            | Other Race <sup>a</sup>                  | 3.8                  | 24.6 1.01 (0.98, 1.03) | 19.9                  | 1.02 (0.99, 1.05) | 5.0                 | 0.97 (0.92, 1.01) |
| Geography                                  | Urban                                    | 79.5                 | 23.0 Ref               | 18.4                  | Ref               | 4.9                 | Ref               |
|                                            | Rural                                    | 20.5                 | 23.1 1.07 (1.03, 1.12) | 16.8                  | 0.98 (0.95, 1.02) | 6.5                 | 1.31 (1.16, 1.49) |
| Medicaid Eligibility                       | Non-Duals                                | 77.2                 | 26.0 Ref               | 20.6                  | Ref               | 5.6                 | Ref               |
|                                            | Duals                                    | 22.8                 | 13.1 0.65 (0.63, 0.68) | 9.4                   | 0.66 (0.64, 0.68) | 3.8                 | 0.72 (0.65, 0.80) |
| Original Reason for Medicare Eligibility   | Age                                      | 80.7                 | 24.5 Ref               | 19.6                  | Ref               | 5.2                 | Ref               |
|                                            | Disability                               | 18.4                 | 16.9 0.92 (0.91, 0.93) | 12.2                  | 0.89 (0.87, 0.90) | 4.8                 | 1.05 (1.01, 1.09) |
|                                            | ESRD                                     | 0.9                  | 16.8 0.96 (0.90, 1.03) | 5.0                   | 0.34 (0.32, 0.37) | 12.2                | 3.05 (2.84, 3.27) |
| Institution                                | Community                                | 86.4                 | 25.3 Ref               | 20.0                  | Ref               | 5.6                 | Ref               |
|                                            | Nursing Home                             | 13.6                 | 8.6 0.35 (0.34, 0.36)  | 5.7                   | 0.34 (0.32, 0.35) | 3.0                 | 0.47 (0.45, 0.50) |
| Chronic Condition Count <sup>b</sup>       | No information                           | 4.3                  | 23.7 1.07 (1.05, 1.09) | 19.8                  | 1.05 (1.03, 1.07) | 4.2                 | 1.14 (1.09, 1.19) |
|                                            | 0                                        | 9.8                  | 23.4 Ref               | 19.9                  | Ref               | 3.8                 | Ref               |
|                                            | 1-3                                      | 15.3                 | 24.5 1.04 (1.03, 1.06) | 21.0                  | 1.04 (1.03, 1.06) | 3.7                 | 1.02 (0.99, 1.05) |
|                                            | 4-5                                      | 16.4                 | 25.5 1.09 (1.07, 1.10) | 21.1                  | 1.05 (1.03, 1.06) | 4.6                 | 1.22 (1.18, 1.27) |
|                                            | 6-9                                      | 32.3                 | 24.3 1.10 (1.08, 1.12) | 18.8                  | 0.99 (0.97, 1.00) | 5.9                 | 1.59 (1.52, 1.65) |
|                                            | 10+                                      | 26.1                 | 18.9 1.02 (1.00, 1.05) | 12.9                  | 0.83 (0.81, 0.85) | 6.3                 | 1.91 (1.80, 2.04) |
| Vaccination Claims <sup>c</sup>            | No Claim                                 | 23.2                 | 18.5 Ref               | 13.0                  | Ref               | 5.7                 | Ref               |
|                                            | 1 or More                                | 76.8                 | 24.4 1.30 (1.27, 1.33) | 19.6                  | 1.46 (1.43, 1.49) | 5.1                 | 0.86 (0.82, 0.89) |
| Nirmatrelvir Contraindication <sup>d</sup> | None                                     | 10.8                 | 23.3 Ref               | 20.3                  | Ref               | 3.2                 | Ref               |
|                                            | Relative                                 | 75.3                 | 23.5 1.12 (1.10, 1.13) | 18.7                  | 1.05 (1.04, 1.06) | 5.2                 | 1.42 (1.38, 1.46) |
|                                            | Strict                                   | 13.8                 | 20.1 1.01 (0.99, 1.03) | 13.2                  | 0.81 (0.79, 0.83) | 7.2                 | 1.89 (1.80, 1.98) |

<sup>a</sup> “Other” race includes American Indian or Alaska Native; Asian; Native Hawaiian or Pacific Islander; these are the four options for self-identified race in the Medicare enrollment file besides White and Black race or Hispanic/Latino. Less than 1% of beneficiaries are coded as “unknown” race.

<sup>b</sup> For the chronic condition count, the presence of 27 conditions was gathered from the Chronic Condition Data Warehouse, which uses claims since 1999 to describe Medicare beneficiaries’ accumulated chronic disease burden. Co-morbidities were defined as any condition present by as of December 31, 2020.

<sup>c</sup> Receipt of vaccination for COVID-19 over the period January 2020 through December 2022, classified as having  $\geq 1$  vaccine claims or having no vaccine claims, which could include both unvaccinated beneficiaries and those who received vaccines without billing Medicare.

<sup>d</sup> We combined drug tiers and indicators for kidney or liver disease into 3 levels of potential nirmatrelvir contraindications: 1) no liver or kidney disease and no drug-drug interactions (no contraindication), 2) any tier 1 interactions and/or liver/kidney disease (moderate contraindication), and 3) any tier 2 drug interaction, with or without liver/kidney disease (severe contraindication).

<sup>e</sup> Telemedicine visits were identified through modifiers GT, GQ, or 95 on eligible outpatient services or CPT codes 99441-99443

**eTable 3.** Proportion of treatment doses proximate to a COVID-19 diagnosis

|                       | Doses     | % of Doses Proximate to a COVID-19 Diagnosis |             |
|-----------------------|-----------|----------------------------------------------|-------------|
|                       | N         | +/- 10 Days                                  | +/- 30 Days |
| <b>Oral Therapies</b> | 1,069,331 | 59.5                                         | 62.1        |
| Nirmatrelvir          | 938,671   | 58.2                                         | 61.0        |
| Molnupiravir          | 131,281   | 68.4                                         | 70.3        |
| <b>IV Therapies</b>   | 270,700   | 98.5                                         | 98.7        |
| Monoclonal Antibodies | 240,465   | 98.4                                         | 98.6        |
| Remdesivir            | 30,457    | 99.6                                         | 99.7        |

Total doses were assessed in 2022, among Medicare beneficiaries with Parts A & B and no Medicare Advantage enrollment; Part D enrollment was not a requirement to reflect full use of Part B IV therapies.

**eTable 4.** Characteristics of oral therapy use with and without COVID-19 diagnosis

|                                            | Beneficiaries           | Oral Fill with and without a COVID-19 diagnosis within +/- 10 days |            | % of Fills without a diagnosis |               |
|--------------------------------------------|-------------------------|--------------------------------------------------------------------|------------|--------------------------------|---------------|
|                                            |                         | N (Col %)                                                          | With Row % |                                | Without Row % |
|                                            | Total, No.              | 20,026,910                                                         | 3.1        | 2.1                            | 40.4%         |
| Age                                        | Under 40                | 2.5                                                                | 1.0        | 0.6                            | 37.9%         |
|                                            | 40-49                   | 2.3                                                                | 1.5        | 0.8                            | 35.1%         |
|                                            | 50-59                   | 3.9                                                                | 1.8        | 1.0                            | 35.6%         |
|                                            | 60-64                   | 3.2                                                                | 2.0        | 1.2                            | 37.2%         |
|                                            | 65-69                   | 25.2                                                               | 3.3        | 2.3                            | 41.2%         |
|                                            | 70-74                   | 24.1                                                               | 3.5        | 2.4                            | 40.8%         |
|                                            | 75-79                   | 17.1                                                               | 3.4        | 2.3                            | 40.4%         |
|                                            | 80-84                   | 11.0                                                               | 3.1        | 2.0                            | 39.4%         |
|                                            | 85-89                   | 6.3                                                                | 2.7        | 1.8                            | 39.8%         |
|                                            | 90+                     | 4.3                                                                | 2.3        | 1.6                            | 40.8%         |
| Sex                                        | Female                  | 56.8                                                               | 3.1        | 2.1                            | 39.7%         |
|                                            | Male                    | 43.2                                                               | 3.0        | 2.1                            | 41.2%         |
| Race                                       | Asian                   | 3.1                                                                | 3.3        | 2.5                            | 42.7%         |
|                                            | Black                   | 6.5                                                                | 1.7        | 0.8                            | 32.0%         |
|                                            | Hispanic                | 5.2                                                                | 2.4        | 1.2                            | 32.6%         |
|                                            | White                   | 81.5                                                               | 3.2        | 2.2                            | 40.7%         |
|                                            | Other Race <sup>a</sup> | 3.7                                                                | 3.3        | 2.6                            | 44.0%         |
| Geography                                  | Urban                   | 76.7                                                               | 3.2        | 2.2                            | 40.7%         |
|                                            | Rural                   | 23.3                                                               | 2.6        | 1.6                            | 39.0%         |
| Medicaid Eligibility                       | Non-Duals               | 78.0                                                               | 3.5        | 2.4                            | 41.1%         |
|                                            | Duals                   | 22.0                                                               | 1.7        | 0.9                            | 34.8%         |
| Original Reason for Medicare Eligibility   | Age                     | 80.2                                                               | 3.3        | 2.3                            | 41.0%         |
|                                            | Disability              | 19.2                                                               | 2.0        | 1.1                            | 36.2%         |
|                                            | ESRD                    | 0.6                                                                | 1.3        | 0.6                            | 32.5%         |
| Institution                                | Community               | 93.6                                                               | 3.1        | 2.2                            | 40.7%         |
|                                            | Nursing Home            | 6.4                                                                | 2.0        | 1.0                            | 32.6%         |
| Chronic Condition Count <sup>b</sup>       | No information          | 4.9                                                                | 3.0        | 2.1                            | 41.4%         |
|                                            | 0                       | 12.8                                                               | 2.6        | 1.9                            | 42.3%         |
|                                            | 1-3                     | 19.0                                                               | 2.9        | 2.1                            | 42.1%         |
|                                            | 4-5                     | 17.7                                                               | 3.3        | 2.3                            | 41.2%         |
|                                            | 6-9                     | 30.7                                                               | 3.3        | 2.2                            | 39.7%         |
|                                            | 10+                     | 19.8                                                               | 2.9        | 1.7                            | 37.6%         |
| Vaccination Claims <sup>c</sup>            | No Claim                | 26.0                                                               | 2.0        | 1.1                            | 35.7%         |
|                                            | 1 or More               | 74.0                                                               | 3.4        | 2.4                            | 41.3%         |
| Nirmatrelvir Contraindication <sup>d</sup> | None                    | 16.5                                                               | 2.3        | 1.6                            | 41.7%         |
|                                            | Relative                | 72.4                                                               | 3.3        | 2.2                            | 40.3%         |
|                                            | Strict                  | 11.2                                                               | 2.8        | 1.8                            | 38.9%         |
| Telemedicine                               | No Use                  | 26.0                                                               | 2.7        | 2.0                            | 43.2%         |
|                                            | Use                     | 74.0                                                               | 3.8        | 2.1                            | 36.2%         |

<sup>a</sup> “Other” race includes American Indian or Alaska Native; Asian; Native Hawaiian or Pacific Islander; these are the four options for self-identified race in the Medicare enrollment file besides White and Black race or Hispanic/Latino. Less than 1% of beneficiaries are coded as “unknown” race.

<sup>b</sup> For the chronic condition count, the presence of 27 conditions was gathered from the Chronic Condition Data Warehouse, which uses claims since 1999 to describe Medicare beneficiaries’ accumulated chronic disease burden. Co-morbidities were defined as any condition present by as of December 31, 2020.

<sup>c</sup> Receipt of vaccination for COVID-19 over the period January 2020 through December 2022, classified as having  $\geq 1$  vaccine claims or having no vaccine claims, which could include both unvaccinated beneficiaries and those who received vaccines without billing Medicare.

<sup>d</sup> We combined drug tiers and indicators for kidney or liver disease into 3 levels of potential nirmatrelvir contraindications: 1) no liver or kidney disease and no drug-drug interactions (no contraindication), 2) any tier 1 interactions and/or liver/kidney disease (moderate contraindication), and 3) any tier 2 drug interaction, with or without liver/kidney disease (severe contraindication).



**eTable 5.** Rates of COVID-19 therapy by demographics in 2022

|                                            | Beneficiaries<br>N (Col %) | Any COVID-19 Therapy |                       | Oral COVID-19 Therapy |                   | IV COVID-19 Therapy |                   |
|--------------------------------------------|----------------------------|----------------------|-----------------------|-----------------------|-------------------|---------------------|-------------------|
|                                            |                            | Row %                | Adj. OR (95% CI)      | Row %                 | Adj. OR (95% CI)  | Row %               | Adj. OR (95% CI)  |
| Total, No.                                 | 20,026,910                 | 6.0                  | --                    | 5.1                   | --                | 1.0                 | --                |
| Age                                        | Under 40                   | 2.5                  | 2.2 0.74 (0.71, 0.77) | 1.7                   | 0.70 (0.67, 0.72) | 0.5                 | 1.04 (0.94, 1.14) |
|                                            | 40-49                      | 2.3                  | 3.1 0.87 (0.85, 0.90) | 2.3                   | 0.85 (0.83, 0.88) | 0.8                 | 1.04 (0.96, 1.12) |
|                                            | 50-59                      | 3.9                  | 3.5 0.88 (0.86, 0.91) | 2.8                   | 0.89 (0.87, 0.91) | 0.8                 | 0.90 (0.85, 0.95) |
|                                            | 60-64                      | 3.2                  | 4.1 0.89 (0.87, 0.91) | 3.2                   | 0.89 (0.87, 0.91) | 0.9                 | 0.89 (0.85, 0.93) |
|                                            | 65-69                      | 25.2                 | 6.4 Ref               | 5.6                   | Ref               | 0.8                 | Ref               |
|                                            | 70-74                      | 24.1                 | 6.8 0.93 (0.92, 0.94) | 5.9                   | 0.93 (0.93, 0.94) | 1.0                 | 0.91 (0.89, 0.93) |
|                                            | 75-79                      | 17.1                 | 6.7 0.85 (0.84, 0.86) | 5.6                   | 0.86 (0.84, 0.87) | 1.1                 | 0.86 (0.84, 0.88) |
|                                            | 80-84                      | 11.0                 | 6.2 0.77 (0.76, 0.79) | 5.0                   | 0.77 (0.75, 0.78) | 1.2                 | 0.83 (0.80, 0.85) |
|                                            | 85-89                      | 6.3                  | 5.7 0.71 (0.70, 0.73) | 4.5                   | 0.71 (0.69, 0.72) | 1.2                 | 0.79 (0.76, 0.82) |
|                                            | 90+                        | 4.3                  | 4.9 0.64 (0.62, 0.65) | 3.8                   | 0.63 (0.61, 0.65) | 1.1                 | 0.73 (0.70, 0.76) |
| Sex                                        | Female                     | 56.8                 | 6.1 1.03 (1.02, 1.04) | 5.2                   | 1.04 (1.03, 1.05) | 1.0                 | 0.98 (0.97, 0.99) |
|                                            | Male                       | 43.2                 | 6.0 Ref               | 5.0                   | Ref               | 1.0                 | Ref               |
| Race                                       | Asian                      | 3.1                  | 6.2 1.10 (1.01, 1.19) | 5.7                   | 1.19 (1.09, 1.31) | 0.6                 | 0.62 (0.54, 0.70) |
|                                            | Black                      | 6.5                  | 3.0 0.56 (0.54, 0.58) | 2.5                   | 0.57 (0.55, 0.60) | 0.6                 | 0.52 (0.48, 0.57) |
|                                            | Hispanic                   | 5.2                  | 4.3 0.86 (0.81, 0.92) | 3.6                   | 0.89 (0.83, 0.95) | 0.7                 | 0.76 (0.64, 0.90) |
|                                            | White                      | 81.5                 | 6.4 Ref               | 5.4                   | Ref               | 1.0                 | Ref               |
|                                            | Other Race <sup>a</sup>    | 3.7                  | 6.8 1.11 (1.09, 1.13) | 5.9                   | 1.12 (1.10, 1.15) | 1.0                 | 1.04 (0.99, 1.09) |
| Geography                                  | Urban                      | 76.7                 | 6.3 Ref               | 5.4                   | Ref               | 1.0                 | Ref               |
|                                            | Rural                      | 23.3                 | 5.2 0.86 (0.83, 0.90) | 4.2                   | 0.82 (0.78, 0.85) | 1.1                 | 1.10 (0.96, 1.26) |
| Medicaid Eligibility                       | Non-Duals                  | 78.0                 | 6.8 Ref               | 5.8                   | Ref               | 1.0                 | Ref               |
|                                            | Duals                      | 22.0                 | 3.3 0.60 (0.57, 0.63) | 2.6                   | 0.58 (0.56, 0.61) | 0.7                 | 0.70 (0.62, 0.78) |
| Original Reason for Medicare Eligibility   | Age                        | 80.2                 | 6.5 Ref               | 5.6                   | Ref               | 1.0                 | Ref               |
|                                            | Disability                 | 19.2                 | 4.0 0.82 (0.81, 0.83) | 3.1                   | 0.80 (0.78, 0.81) | 0.9                 | 0.95 (0.91, 0.99) |
|                                            | ESRD                       | 0.6                  | 5.5 1.13 (1.06, 1.20) | 2.0                   | 0.48 (0.45, 0.51) | 3.7                 | 3.90 (3.62, 4.19) |
| Institution                                | Community                  | 93.6                 | 6.2 Ref               | 5.3                   | Ref               | 1.0                 | Ref               |
|                                            | Nursing Home               | 6.4                  | 4.2 0.78 (0.75, 0.81) | 3.0                   | 0.71 (0.67, 0.75) | 1.2                 | 1.01 (0.96, 1.06) |
| Chronic Condition Count <sup>b</sup>       | No information             | 4.9                  | 5.7 1.20 (1.19, 1.22) | 5.0                   | 1.19 (1.18, 1.21) | 0.7                 | 1.32 (1.27, 1.38) |
|                                            | 0                          | 12.8                 | 5.0 Ref               | 4.5                   | Ref               | 0.6                 | Ref               |
|                                            | 1-3                        | 19.0                 | 5.5 1.13 (1.11, 1.14) | 4.9                   | 1.13 (1.11, 1.14) | 0.6                 | 1.12 (1.08, 1.16) |
|                                            | 4-5                        | 17.7                 | 6.4 1.26 (1.24, 1.28) | 5.6                   | 1.23 (1.21, 1.25) | 0.8                 | 1.48 (1.42, 1.54) |
|                                            | 6-9                        | 30.7                 | 6.6 1.38 (1.35, 1.41) | 5.5                   | 1.28 (1.26, 1.31) | 1.2                 | 2.13 (2.05, 2.22) |
|                                            | 10+                        | 19.8                 | 6.1 1.47 (1.42, 1.51) | 4.6                   | 1.26 (1.22, 1.30) | 1.6                 | 2.99 (2.82, 3.17) |
| Vaccination Claims <sup>c</sup>            | No Claim                   | 26.0                 | 4.0 Ref               | 3.1                   | Ref               | 1.0                 | Ref               |
|                                            | 1 or More                  | 74.0                 | 6.7 1.44 (1.41, 1.48) | 5.8                   | 1.60 (1.56, 1.63) | 1.0                 | 0.88 (0.85, 0.93) |
| Nirmatrelvir Contraindication <sup>d</sup> | None                       | 16.5                 | 4.3 Ref               | 3.9                   | Ref               | 0.4                 | Ref               |
|                                            | Relative                   | 72.4                 | 6.4 1.41 (1.39, 1.42) | 5.5                   | 1.35 (1.34, 1.37) | 1.0                 | 1.87 (1.82, 1.93) |
|                                            | Strict                     | 11.2                 | 6.1 1.36 (1.33, 1.39) | 4.5                   | 1.17 (1.14, 1.20) | 1.7                 | 2.69 (2.58, 2.81) |

<sup>a</sup> “Other” race includes American Indian or Alaska Native; Asian; Native Hawaiian or Pacific Islander; these are the four options for self-identified race in the Medicare enrollment file besides White and Black race or Hispanic/Latino. Less than 1% of beneficiaries are coded as “unknown” race.

<sup>b</sup> For the chronic condition count, the presence of 27 conditions was gathered from the Chronic Condition Data Warehouse, which uses claims since 1999 to describe Medicare beneficiaries’ accumulated chronic disease burden. Co-morbidities were defined as any condition present by as of December 31, 2020.

<sup>c</sup> Receipt of vaccination for COVID-19 over the period January 2020 through December 2022, classified as having  $\geq 1$  vaccine claims or having no vaccine claims, which could include both unvaccinated beneficiaries and those who received vaccines without billing Medicare.

<sup>d</sup> We combined drug tiers and indicators for kidney or liver disease into 3 levels of potential nirmatrelvir contraindications: 1) no liver or kidney disease and no drug-drug interactions (no contraindication), 2) any tier 1 interactions and/or liver/kidney disease (moderate contraindication), and 3) any tier 2 drug interaction, with or without liver/kidney disease (severe contraindication).

<sup>e</sup> Telemedicine visits were identified through modifiers GT, GQ, or 95 on eligible outpatient services or CPT codes 99441-99443

**eTable 6. Rates of COVID-19 therapy by demographics among the unvaccinated in 2022**

|                                            | Beneficiaries<br>N (col %) | Any COVID-19 Therapy |                       | Oral COVID-19 Therapy |                   | IV COVID-19 Therapy |                   |
|--------------------------------------------|----------------------------|----------------------|-----------------------|-----------------------|-------------------|---------------------|-------------------|
|                                            |                            | Row %                | Adj. OR (95% CI)      | Row %                 | Adj. OR (95% CI)  | Row %               | Adj. OR (95% CI)  |
| Total, No.                                 | 5,216,134                  | 4.0                  | --                    | 3.1                   | --                | 1.0                 | --                |
| Age                                        | Under 40                   | 5.4                  | 1.5 0.76 (0.72, 0.79) | 1.1                   | 0.73 (0.7, 0.77)  | 0.4                 | 0.87 (0.78, 0.97) |
|                                            | 40-49                      | 4.4                  | 2.2 0.88 (0.84, 0.92) | 1.7                   | 0.88 (0.84, 0.92) | 0.6                 | 0.89 (0.82, 0.97) |
|                                            | 50-59                      | 6.7                  | 2.6 0.88 (0.85, 0.91) | 2.0                   | 0.91 (0.87, 0.94) | 0.7                 | 0.82 (0.76, 0.88) |
|                                            | 60-64                      | 5.0                  | 3.1 0.89 (0.86, 0.93) | 2.4                   | 0.92 (0.89, 0.95) | 0.7                 | 0.83 (0.78, 0.88) |
|                                            | 65-69                      | 27.1                 | 4.3 Ref               | 3.5                   | Ref               | 0.9                 | Ref               |
|                                            | 70-74                      | 20.5                 | 4.7 0.93 (0.91, 0.94) | 3.7                   | 0.92 (0.91, 0.94) | 1.1                 | 0.94 (0.91, 0.98) |
|                                            | 75-79                      | 13.5                 | 4.8 0.85 (0.84, 0.87) | 3.6                   | 0.85 (0.83, 0.88) | 1.2                 | 0.87 (0.84, 0.91) |
|                                            | 80-84                      | 8.7                  | 4.6 0.79 (0.78, 0.81) | 3.4                   | 0.78 (0.76, 0.8)  | 1.3                 | 0.86 (0.82, 0.9)  |
|                                            | 85-89                      | 5.1                  | 4.4 0.75 (0.72, 0.77) | 3.2                   | 0.73 (0.7, 0.75)  | 1.3                 | 0.82 (0.78, 0.87) |
|                                            | 90+                        | 3.7                  | 3.9 0.65 (0.63, 0.68) | 2.8                   | 0.64 (0.61, 0.66) | 1.2                 | 0.73 (0.68, 0.79) |
| Sex                                        | Female                     | 54.9                 | 4.3 1.16 (1.15, 1.17) | 3.4                   | 1.18 (1.16, 1.19) | 1.0                 | 1.1 (1.08, 1.12)  |
|                                            | Male                       | 45.1                 | 3.7 Ref               | 2.8                   | Ref               | 0.9                 | Ref               |
| Race                                       | Asian                      | 2.4                  | 3.7 1.06 (0.94, 1.2)  | 3.2                   | 1.23 (1.07, 1.42) | 0.5                 | 0.55 (0.47, 0.65) |
|                                            | Black                      | 8.9                  | 1.9 0.56 (0.52, 0.59) | 1.5                   | 0.59 (0.56, 0.62) | 0.4                 | 0.47 (0.42, 0.53) |
|                                            | Hispanic                   | 7.8                  | 2.8 0.84 (0.76, 0.93) | 2.3                   | 0.91 (0.82, 1)    | 0.6                 | 0.65 (0.53, 0.81) |
|                                            | White                      | 77.4                 | 4.4 Ref               | 3.4                   | Ref               | 1.1                 | Ref               |
|                                            | Other Race <sup>a</sup>    | 3.5                  | 3.8 1.03 (1, 1.07)    | 2.9                   | 1.04 (0.99, 1.08) | 0.9                 | 1.03 (0.95, 1.11) |
| Geography                                  | Urban                      | 68.2                 | 4.0 Ref               | 3.2                   | Ref               | 0.9                 | Ref               |
|                                            | Rural                      | 31.8                 | 4.1 0.95 (0.91, 1)    | 3.0                   | 0.9 (0.86, 0.94)  | 1.1                 | 1.14 (1, 1.31)    |
| Medicaid Eligibility                       | Non-Duals                  | 64.7                 | 4.9 Ref               | 3.9                   | Ref               | 1.1                 | Ref               |
|                                            | Duals                      | 35.3                 | 2.4 0.58 (0.54, 0.61) | 1.8                   | 0.55 (0.53, 0.57) | 0.6                 | 0.69 (0.59, 0.8)  |
| Original Reason for Medicare Eligibility   | Age                        | 69.8                 | 4.6 Ref               | 3.6                   | Ref               | 1.0                 | Ref               |
|                                            | Disability                 | 29.5                 | 2.8 0.82 (0.79, 0.84) | 2.1                   | 0.8 (0.78, 0.82)  | 0.7                 | 0.87 (0.81, 0.94) |
|                                            | ESRD                       | 0.7                  | 4.2 1.19 (1.1, 1.28)  | 1.4                   | 0.5 (0.45, 0.55)  | 2.9                 | 3.52 (3.21, 3.85) |
| Institution                                | Community                  | 94.4                 | 4.1 Ref               | 3.2                   | Ref               | 0.9                 | Ref               |
|                                            | Nursing Home               | 5.6                  | 3.8 0.91 (0.88, 0.95) | 2.5                   | 0.83 (0.79, 0.87) | 1.3                 | 1.11 (1.05, 1.18) |
| Chronic Condition Count <sup>b</sup>       | No information             | 8.2                  | 3.9 1.36 (1.32, 1.4)  | 3.2                   | 1.35 (1.31, 1.39) | 0.7                 | 1.37 (1.29, 1.46) |
|                                            | 0                          | 19.7                 | 3.1 Ref               | 2.5                   | Ref               | 0.5                 | Ref               |
|                                            | 1-3                        | 21.1                 | 3.2 1.18 (1.15, 1.21) | 2.6                   | 1.17 (1.14, 1.21) | 0.6                 | 1.2 (1.14, 1.27)  |
|                                            | 4-5                        | 16.3                 | 4.2 1.39 (1.35, 1.44) | 3.4                   | 1.35 (1.31, 1.4)  | 0.9                 | 1.56 (1.47, 1.65) |
|                                            | 6-9                        | 26.2                 | 4.8 1.6 (1.55, 1.65)  | 3.7                   | 1.49 (1.44, 1.54) | 1.2                 | 2.1 (1.99, 2.21)  |
|                                            | 10+                        | 16.8                 | 4.9 1.77 (1.69, 1.85) | 3.4                   | 1.53 (1.46, 1.6)  | 1.6                 | 2.75 (2.57, 2.94) |
| Nirmatrelvir Contraindication <sup>d</sup> | None                       | 23.6                 | 2.3 Ref               | 1.9                   | Ref               | 0.4                 | Ref               |
|                                            | Relative                   | 66.0                 | 4.5 1.8 (1.76, 1.83)  | 3.5                   | 1.76 (1.73, 1.8)  | 1.1                 | 1.94 (1.85, 2.02) |
|                                            | Strict                     | 10.4                 | 4.8 1.88 (1.83, 1.93) | 3.3                   | 1.65 (1.6, 1.71)  | 1.6                 | 2.63 (2.5, 2.77)  |

<sup>a</sup> “Other” race includes American Indian or Alaska Native; Asian; Native Hawaiian or Pacific Islander; these are the four options for self-identified race in the Medicare enrollment file besides White and Black race or Hispanic/Latino. Less than 1% of beneficiaries are coded as “unknown” race.

<sup>b</sup> For the chronic condition count, the presence of 27 conditions was gathered from the Chronic Condition Data Warehouse, which uses claims since 1999 to describe Medicare beneficiaries' accumulated chronic disease burden. Co-morbidities were defined as any condition present by as of December 31, 2020.

<sup>c</sup> Receipt of vaccination for COVID-19 over the period January 2020 through December 2022, classified as having  $\geq 1$  vaccine claims or having no vaccine claims, which could include both unvaccinated beneficiaries and those who received vaccines without billing Medicare.

<sup>d</sup> We combined drug tiers and indicators for kidney or liver disease into 3 levels of potential nirmatrelvir contraindications: 1) no liver or kidney disease and no drug-drug interactions (no contraindication), 2) any tier 1 interactions and/or liver/kidney disease (moderate contraindication), and 3) any tier 2 drug interaction, with or without liver/kidney disease (severe contraindication).

<sup>e</sup> Telemedicine visits were identified through modifiers GT, GQ, or 95 on eligible outpatient services or CPT codes 99441-99443

**eTable 7. Rates of COVID-19 therapy by demographics among the aged 65 years and over in 2022**

|                                            | Beneficiaries<br>N (Col %) | Any COVID-19 Therapy |                  | Oral COVID-19 Therapy |                  | IV COVID-19 Therapy |                  |                    |
|--------------------------------------------|----------------------------|----------------------|------------------|-----------------------|------------------|---------------------|------------------|--------------------|
|                                            |                            | Row %                | Adj. OR (95% CI) | Row %                 | Adj. OR (95% CI) | Row %               | Adj. OR (95% CI) |                    |
| Total, No.                                 | 20,026,910                 | 6.0                  | --               | 5.1                   | --               | 6.0                 | --               |                    |
| Age                                        | Under 40                   | --                   | --               | --                    | --               | --                  | --               |                    |
|                                            | 40-49                      | --                   | --               | --                    | --               | --                  | --               |                    |
|                                            | 50-59                      | --                   | --               | --                    | --               | --                  | --               |                    |
|                                            | 60-64                      | --                   | --               | --                    | --               | --                  | --               |                    |
|                                            | 65-69                      | 28.6                 | 6.4              | Ref                   | 5.6              | Ref                 | 0.8              | Ref                |
|                                            | 70-74                      | 27.4                 | 6.8              | 0.93 (0.93, 0.94)     | 5.9              | 0.94 (0.93, 0.95)   | 1.0              | 0.90 (0.89, 0.92)  |
|                                            | 75-79                      | 19.4                 | 6.7              | 0.86 (0.85, 0.87)     | 5.6              | 0.86 (0.85, 0.88)   | 1.1              | 0.85 (0.84, 0.87)  |
|                                            | 80-84                      | 12.5                 | 6.2              | 0.78 (0.77, 0.80)     | 5.0              | 0.78 (0.76, 0.79)   | 1.2              | 0.82 (0.80, 0.85)  |
|                                            | 85-89                      | 7.2                  | 5.7              | 0.73 (0.71, 0.74)     | 4.5              | 0.72 (0.70, 0.73)   | 1.2              | 0.79 (0.76, 0.81)  |
|                                            | 90+                        | 4.9                  | 4.9              | 0.65 (0.63, 0.67)     | 3.8              | 0.64 (0.62, 0.66)   | 1.1              | 0.73 (0.69, 0.76)  |
| Sex                                        | Female                     | 58.0                 | 6.3              | 1.00 (0.99, 1.01)     | 5.4              | 1.01 (1.00, 1.02)   | 1.0              | 0.93 (0.92, 0.95)  |
|                                            | Male                       | 42.0                 | 6.6              | Ref                   | 5.5              | Ref                 | 1.1              | Ref                |
| Race                                       | Asian                      | 3.2                  | 6.5              | 1.11 (1.03, 1.21)     | 6.0              | 1.21 (1.11, 1.33)   | 0.6              | 0.60 (0.52, 0.68)  |
|                                            | Black                      | 5.1                  | 3.4              | 0.55 (0.53, 0.57)     | 2.8              | 0.56 (0.54, 0.59)   | 0.6              | 0.50 (0.45, 0.55)  |
|                                            | Hispanic                   | 4.5                  | 4.6              | 0.85 (0.80, 0.92)     | 3.9              | 0.88 (0.82, 0.94)   | 0.7              | 0.75 (0.62, 0.90)  |
|                                            | White                      | 83.6                 | 6.6              | Ref                   | 5.6              | Ref                 | 1.1              | Ref                |
|                                            | Other Race <sup>a</sup>    | 3.6                  | 7.5              | 1.12 (1.10, 1.14)     | 6.5              | 1.13 (1.11, 1.15)   | 1.0              | 1.028 (0.98, 1.08) |
| Geography                                  | Urban                      | 77.1                 | 6.7              | Ref                   | 5.7              | Ref                 | 1.0              | Ref                |
|                                            | Rural                      | 22.9                 | 5.5              | 0.85 (0.81, 0.89)     | 4.5              | 0.81 (0.78, 0.85)   | 1.1              | 1.09 (0.95, 1.25)  |
| Medicaid Eligibility                       | Non-Duals                  | 85.6                 | 6.9              | Ref                   | 5.9              | Ref                 | 1.0              | Ref                |
|                                            | Duals                      | 14.4                 | 3.6              | 0.60 (0.56, 0.63)     | 2.8              | 0.58 (0.55, 0.61)   | 0.8              | 0.72 (0.63, 0.82)  |
| Original Reason for Medicare Eligibility   | Age                        | 90.8                 | 6.5              | Ref                   | 5.6              | Ref                 | 1.0              | Ref                |
|                                            | Disability                 | 9.0                  | 5.1              | 0.83 (0.82, 0.85)     | 4.0              | 0.81 (0.79, 0.82)   | 1.2              | 0.94 (0.90, 0.98)  |
|                                            | ESRD                       | 0.2                  | 7.0              | 1.07 (1.00, 1.14)     | 2.7              | 0.50 (0.46, 0.53)   | 4.5              | 3.63 (3.31, 3.99)  |
| Institution                                | Community                  | 93.4                 | 6.6              | Ref                   | 5.6              | Ref                 | 1.0              | Ref                |
|                                            | Nursing Home               | 6.6                  | 4.3              | 0.78 (0.75, 0.81)     | 3.1              | 0.71 (0.67, 0.75)   | 1.2              | 1.01 (0.96, 1.06)  |
| Chronic Condition Count <sup>b</sup>       | No information             | 4.4                  | 6.2              | 1.16 (1.15, 1.18)     | 5.5              | 1.16 (1.15, 1.18)   | 0.7              | 1.21 (1.15, 1.26)  |
|                                            | 0                          | 11.9                 | 5.5              | Ref                   | 5.0              | Ref                 | 0.6              | Ref                |
|                                            | 1-3                        | 17.9                 | 6.1              | 1.12 (1.11, 1.14)     | 5.6              | 1.12 (1.11, 1.14)   | 0.6              | 1.11 (1.07, 1.15)  |
|                                            | 4-5                        | 17.7                 | 6.8              | 1.24 (1.22, 1.26)     | 6.0              | 1.21 (1.19, 1.23)   | 0.8              | 1.46 (1.40, 1.51)  |
|                                            | 6-9                        | 31.5                 | 6.9              | 1.35 (1.33, 1.38)     | 5.8              | 1.26 (1.24, 1.29)   | 1.2              | 2.11 (2.02, 2.20)  |
|                                            | 10+                        | 21.0                 | 6.2              | 1.43 (1.38, 1.48)     | 4.7              | 1.23 (1.20, 1.27)   | 1.6              | 2.96 (2.78, 3.15)  |
| Vaccination Claims <sup>c</sup>            | No Claim                   | 23.2                 | 4.5              | Ref                   | 3.5              | Ref                 | 1.1              | Ref                |
|                                            | 1 or More                  | 76.8                 | 7.0              | 1.43 (1.39, 1.46)     | 6.0              | 1.59 (1.55, 1.63)   | 1.0              | 0.85 (0.81, 0.89)  |
| Nirmatrelvir Contraindication <sup>d</sup> | None                       | 16.0                 | 4.7              | Ref                   | 4.3              | Ref                 | 0.4              | Ref                |
|                                            | Relative                   | 72.9                 | 6.8              | 1.38 (1.363, 1.398)   | 5.8              | 1.33 (1.32, 1.35)   | 1.0              | 1.80 (1.75, 1.85)  |
|                                            | Strict                     | 11.1                 | 6.5              | 1.34 (1.31, 1.37)     | 4.8              | 1.15 (1.12, 1.19)   | 1.7              | 2.63 (2.52, 2.75)  |

<sup>a</sup> “Other” race includes American Indian or Alaska Native; Asian; Native Hawaiian or Pacific Islander; these are the four options for self-identified race in the Medicare enrollment file besides White and Black race or Hispanic/Latino. Less than 1% of beneficiaries are coded as “unknown” race.

<sup>b</sup> For the chronic condition count, the presence of 27 conditions was gathered from the Chronic Condition Data Warehouse, which uses claims since 1999 to describe Medicare beneficiaries’ accumulated chronic disease burden. Co-morbidities were defined as any condition present by as of December 31, 2020.

<sup>c</sup> Receipt of vaccination for COVID-19 over the period January 2020 through December 2022, classified as having  $\geq 1$  vaccine claims or having no vaccine claims, which could include both unvaccinated beneficiaries and those who received vaccines without billing Medicare.

<sup>d</sup> We combined drug tiers and indicators for kidney or liver disease into 3 levels of potential nirmatrelvir contraindications: 1) no liver or kidney disease and no drug-drug interactions (no contraindication), 2) any tier 1 interactions and/or liver/kidney disease (moderate contraindication), and 3) any tier 2 drug interaction, with or without liver/kidney disease (severe contraindication).

<sup>e</sup> Telemedicine visits were identified through modifiers GT, GQ, or 95 on eligible outpatient services or CPT codes 99441-99443

**eTable 8.** Rates of oral COVID-19 therapy by basic demographics among Medicare Advantage and traditional Medicare in 2022

|                      |                         | Traditional Medicare       |       |                   | Medicare Advantage         |       |                   |
|----------------------|-------------------------|----------------------------|-------|-------------------|----------------------------|-------|-------------------|
|                      |                         | Beneficiaries<br>N (Col %) | Row % | Adj. OR (95% CI)  | Beneficiaries<br>N (Col %) | Row % | Adj. OR (95% CI)  |
|                      | Total, No.              | 20,026,910                 | 5.1   | --                | 27,306,324                 | 3.5   | --                |
| Age                  | Under 40                | 2.5                        | 1.7   | 0.58 (0.55, 0.6)  | 1.3                        | 1.4   | 0.72 (0.68, 0.76) |
|                      | 40-49                   | 2.3                        | 2.3   | 0.79 (0.76, 0.81) | 1.9                        | 1.9   | 0.89 (0.85, 0.93) |
|                      | 50-59                   | 3.9                        | 2.8   | 0.87 (0.85, 0.89) | 5.2                        | 2.2   | 0.94 (0.91, 0.96) |
|                      | 60-64                   | 3.2                        | 3.2   | 0.89 (0.87, 0.91) | 5.3                        | 2.5   | 0.98 (0.96, 0.99) |
|                      | 65-69                   | 25.2                       | 5.6   | Ref               | 26.4                       | 3.4   | Ref               |
|                      | 70-74                   | 24.1                       | 5.9   | 1.02 (1.01, 1.03) | 23.9                       | 3.9   | 1.09 (1.08, 1.1)  |
|                      | 75-79                   | 17.1                       | 5.6   | 0.98 (0.96, 0.99) | 16.9                       | 4.0   | 1.11 (1.09, 1.13) |
|                      | 80-84                   | 11.0                       | 5.0   | 0.89 (0.87, 0.91) | 10.3                       | 3.8   | 1.07 (1.05, 1.09) |
|                      | 85-89                   | 6.3                        | 4.5   | 0.82 (0.8, 0.84)  | 5.6                        | 3.6   | 1.01 (0.98, 1.03) |
|                      | 90+                     | 4.3                        | 3.8   | 0.73 (0.71, 0.75) | 3.2                        | 3.3   | 0.94 (0.91, 0.97) |
| Sex                  | Female                  | 56.8                       | 5.2   | 1.03 (1.03, 1.04) | 56.7                       | 3.6   | 1.11 (1.1, 1.12)  |
|                      | Male                    | 43.2                       | 5.0   | Ref               | 43.3                       | 3.4   | Ref               |
| Race                 | Asian                   | 3.1                        | 5.7   | 1.22 (1.11, 1.35) | 4.2                        | 4.3   | 1.21 (1.09, 1.34) |
|                      | Black                   | 6.5                        | 2.5   | 0.57 (0.55, 0.6)  | 13.4                       | 1.8   | 0.55 (0.52, 0.58) |
|                      | Hispanic                | 5.2                        | 3.6   | 0.86 (0.8, 0.92)  | 11.5                       | 2.9   | 0.87 (0.79, 0.95) |
|                      | White                   | 81.5                       | 5.4   | Ref               | 68.2                       | 3.9   | Ref               |
|                      | Other Race <sup>a</sup> | 3.7                        | 5.9   | 1.14 (1.11, 1.16) | 2.7                        | 4.0   | 1.07 (1.03, 1.1)  |
| Geography            | Urban                   | 76.7                       | 5.4   | Ref               | 83.5                       | 3.6   | Ref               |
|                      | Rural                   | 23.3                       | 4.2   | 0.77 (0.74, 0.81) | 16.5                       | 3.1   | 0.85 (0.8, 0.89)  |
| Medicaid Eligibility | Non-Duals               | 78.0                       | 5.8   | Ref               | 75.2                       | 4.0   | Ref               |
|                      | Duals                   | 22.0                       | 2.6   | 0.55 (0.53, 0.57) | 24.8                       | 1.9   | 0.54 (0.5, 0.57)  |
| OREC                 | Age                     | 80.2                       | 5.6   | Ref               | 75.5                       | 3.8   | Ref               |
|                      | Disability              | 19.2                       | 3.1   | 0.84 (0.83, 0.86) | 24.2                       | 2.5   | 0.89 (0.87, 0.91) |
|                      | ESRD                    | 0.6                        | 2.0   | 0.56 (0.53, 0.6)  | 0.3                        | 1.3   | 0.54 (0.49, 0.59) |
| Institutionalization | Community               | 93.9                       | 5.3   | Ref               | 95.6                       | 3.5   | Ref               |
|                      | Nursing Home            | 6.1                        | 2.9   | 0.74 (0.7, 0.78)  | 4.4                        | 2.7   | 0.89 (0.86, 0.92) |

<sup>a</sup> “Other” race includes American Indian or Alaska Native; Asian; Native Hawaiian or Pacific Islander; these are the four options for self-identified race in the Medicare enrollment file besides White and Black race or Hispanic/Latino. Less than 1% of beneficiaries are coded as “unknown” race.

**eTable 9.** Rates of COVID-19 therapies and other services by severity risk quintile

|                                | Beneficiaries<br>N (Col %) | Any<br>COVID-19<br>Therapy<br>Row % | Oral<br>COVID-19<br>Therapy<br>Row % | IV COVID-<br>19 Therapy<br>Row % | COVID-19<br>Test<br>Row % | COVID-19<br>E&M Visit<br>Row % | COVID-19<br>Inpatient<br>Row % |
|--------------------------------|----------------------------|-------------------------------------|--------------------------------------|----------------------------------|---------------------------|--------------------------------|--------------------------------|
| <i>Full study population</i>   |                            |                                     |                                      |                                  |                           |                                |                                |
| Total, No.                     | 20,026,910                 | 6.0                                 | 5.1                                  | 1.0                              | 32.9                      | 10.7                           | 1.0                            |
| Risk Quintiles                 |                            |                                     |                                      |                                  |                           |                                |                                |
| Lowest                         | 20.0                       | 7.6                                 | 6.9                                  | 0.8                              | 34.3                      | 10.0                           | 0.2                            |
| Low-mid                        | 20.0                       | 6.7                                 | 5.9                                  | 0.8                              | 31.8                      | 9.4                            | 0.3                            |
| Middle                         | 20.0                       | 5.8                                 | 4.9                                  | 0.9                              | 31.2                      | 9.6                            | 0.6                            |
| Mid-high                       | 20.0                       | 5.2                                 | 4.2                                  | 1.1                              | 31.9                      | 10.4                           | 1.1                            |
| Highest                        | 20.0                       | 4.9                                 | 3.7                                  | 1.3                              | 35.4                      | 14.1                           | 2.6                            |
| <i>Among COVID-19 patients</i> |                            |                                     |                                      |                                  |                           |                                |                                |
| Total, No.                     | 3,715,664                  | 23.0                                | 18.1                                 | 5.2                              | 59.4                      | 57.8                           | 5.1                            |
| Risk Quintiles                 |                            |                                     |                                      |                                  |                           |                                |                                |
| Lowest                         | 20.0                       | 26.9                                | 23.3                                 | 3.9                              | 57.9                      | 51.9                           | 0.9                            |
| Low-mid                        | 20.0                       | 26.4                                | 22.0                                 | 4.6                              | 58.0                      | 54.0                           | 1.7                            |
| Middle                         | 20.0                       | 24.1                                | 18.8                                 | 5.6                              | 60.9                      | 57.7                           | 3.6                            |
| Mid-high                       | 20.0                       | 21.4                                | 15.4                                 | 6.3                              | 61.9                      | 60.9                           | 7.0                            |
| Highest                        | 20.0                       | 16.4                                | 10.9                                 | 5.7                              | 58.4                      | 64.3                           | 12.5                           |

See eMethods 2 for details on construction of the COVID-19 severity risk score for beneficiaries.



**eTable 10.** Impact of further adjustment for hospital region or primary care practice on adjusted effect sizes

|                                            | Sample Average          | Unadjusted Effect | Control Variables    | Control Variables + Hospital Referral Region |                      | Control Variables + Primary Care Practice |                      |       |
|--------------------------------------------|-------------------------|-------------------|----------------------|----------------------------------------------|----------------------|-------------------------------------------|----------------------|-------|
|                                            |                         | Coef. (95% CI)    | Coef. (95% CI)       | Coef. (95% CI)                               | % Chg                | Coef. (95% CI)                            | % Chg                |       |
|                                            | Total, No.              | 20,026,910        |                      |                                              |                      |                                           |                      |       |
| Age                                        | Under 40                | 2.2               | -4.24 (-4.41, -4.07) | -0.23 (-0.36, -0.11)                         | -0.17 (-0.31, -0.02) | -29.5                                     | -0.29 (-0.39, -0.19) | 22.6  |
|                                            | 40-49                   | 3.1               | -3.35 (-3.50, -3.20) | -0.21 (-0.33, -0.08)                         | -0.16 (-0.3, -0.02)  | -21.6                                     | -0.20 (-0.30, -0.09) | -5.3  |
|                                            | 50-59                   | 3.5               | -2.87 (-3.02, -2.72) | -0.41 (-0.52, -0.29)                         | -0.40 (-0.52, -0.28) | -1.2                                      | -0.37 (-0.46, -0.27) | -9.1  |
|                                            | 60-64                   | 4.1               | -2.35 (-2.51, -2.20) | -0.50 (-0.60, -0.40)                         | -0.51 (-0.61, -0.42) | 2.4                                       | -0.39 (-0.47, -0.30) | -22.2 |
|                                            | 65-69 (Reference)       | 6.4               |                      |                                              |                      |                                           |                      |       |
|                                            | 70-74                   | 6.8               | 0.42 (0.35, 0.48)    | -0.33 (-0.38, -0.28)                         | -0.35 (-0.39, -0.30) | 3.9                                       | -0.32 (-0.36, -0.28) | -3.9  |
|                                            | 75-79                   | 6.7               | 0.24 (0.14, 0.35)    | -0.83 (-0.91, -0.75)                         | -0.87 (-0.94, -0.80) | 4.6                                       | -0.84 (-0.91, -0.77) | 1.0   |
|                                            | 80-84                   | 6.2               | -0.25 (-0.37, -0.12) | -1.42 (-1.52, -1.31)                         | -1.46 (-1.55, -1.37) | 2.8                                       | -1.41 (-1.50, -1.32) | -0.7  |
|                                            | 85-89                   | 5.7               | -0.73 (-0.87, -0.59) | -1.84 (-1.96, -1.73)                         | -1.91 (-2.01, -1.81) | 3.8                                       | -1.82 (-1.92, -1.73) | -1.1  |
|                                            | 90+                     | 4.9               | -1.47 (-1.64, -1.30) | -2.40 (-2.56, -2.25)                         | -2.49 (-2.64, -2.35) | 3.7                                       | -2.37 (-2.50, -2.23) | -1.3  |
| Sex                                        | Female                  | 6.1               | 0.07 (0.03, 0.12)    | 0.11 (0.07, 0.15)                            | 0.10 (0.07, 0.14)    | -7.1                                      | 0.05 (0.01, 0.09)    | -57.7 |
|                                            | Male (Reference)        | 6.0               |                      |                                              |                      |                                           |                      |       |
| Race                                       | Asian                   | 6.2               | -0.14 (-0.60, 0.33)  | 0.40 (-0.06, 0.86)                           | -0.01 (-0.29, 0.27)  | -102.5                                    | 0.05 (-0.15, 0.26)   | -86.7 |
|                                            | Black                   | 3.0               | -3.37 (-3.57, -3.17) | -2.25 (-2.43, -2.07)                         | -2.43 (-2.62, -2.23) | 8.0                                       | -2.04 (-2.16, -1.92) | -9.3  |
|                                            | Hispanic                | 4.3               | -2.09 (-2.43, -1.76) | -0.74 (-1.02, -0.46)                         | -1.04 (-1.36, -0.72) | 40.2                                      | -0.58 (-0.74, -0.43) | -21.4 |
|                                            | White (Reference)       | 6.4               |                      |                                              |                      |                                           |                      |       |
|                                            | Other Race <sup>a</sup> | 6.8               | 0.47 (0.32, 0.62)    | 0.63 (0.51, 0.76)                            | 0.51 (0.39, 0.62)    | -20.2                                     | 0.41 (0.33, 0.50)    | -34.7 |
| Geography                                  | Urban (Reference)       | 6.3               |                      |                                              |                      |                                           |                      |       |
|                                            | Rural                   | 5.2               | -1.06 (-1.31, -0.81) | -0.83 (-1.07, -0.58)                         | -0.62 (-0.76, -0.49) | -24.5                                     | -0.38 (-0.48, -0.28) | -54.0 |
| Medicaid Eligibility                       | Non-Duals (Reference)   | 6.8               |                      |                                              |                      |                                           |                      |       |
|                                            | Duals                   | 3.3               | -3.56 (-3.73, -3.39) | -2.28 (-2.45, -2.12)                         | -2.42 (-2.62, -2.21) | 6.1                                       | -1.93 (-2.06, -1.80) | -15.4 |
| Original Reason for Medicare Eligibility   | Age (Reference)         | 6.5               |                      |                                              |                      |                                           |                      |       |
|                                            | Disability              | 4.0               | -2.57 (-2.72, -2.43) | -1.11 (-1.21, -1.01)                         | -1.08 (-1.15, -1.00) | -2.7                                      | -0.91 (-0.97, -0.84) | -18.1 |
|                                            | ESRD                    | 5.5               | -1.03 (-1.40, -0.66) | 0.05 (-0.28, 0.39)                           | 0.14 (-0.20, 0.47)   | 162.0                                     | 0.12 (-0.20, 0.44)   | 137.0 |
| Institution                                | Community (Reference)   | 6.2               |                      |                                              |                      |                                           |                      |       |
|                                            | Nursing Home            | 4.2               | -2.02 (-2.23, -1.81) | -1.24 (-1.42, -1.07)                         | -1.22 (-1.37, -1.07) | -1.6                                      | -0.95 (-1.08, -0.83) | -23.1 |
| Chronic Condition Count <sup>b</sup>       | No information          | 5.7               | 1.11 (1.04, 1.19)    | 0.85 (0.78, 0.92)                            | 0.86 (0.80, 0.93)    | 1.5                                       | 1.03 (0.97, 1.10)    | 21.5  |
|                                            | 0 (Reference)           | 5.0               |                      |                                              |                      |                                           |                      |       |
|                                            | 1-3                     | 5.5               | 0.90 (0.83, 0.96)    | 0.50 (0.44, 0.55)                            | 0.52 (0.47, 0.57)    | 5.2                                       | 0.20 (0.14, 0.25)    | -60.7 |
|                                            | 4-5                     | 6.4               | 1.78 (1.70, 1.86)    | 1.09 (1.03, 1.16)                            | 1.11 (1.05, 1.17)    | 1.8                                       | 0.72 (0.66, 0.79)    | -33.7 |
|                                            | 6-9                     | 6.6               | 2.04 (1.93, 2.15)    | 1.62 (1.53, 1.71)                            | 1.61 (1.53, 1.69)    | -0.6                                      | 1.19 (1.12, 1.27)    | -26.5 |
|                                            | 10+                     | 6.1               | 1.51 (1.31, 1.70)    | 1.92 (1.74, 2.10)                            | 1.83 (1.71, 1.96)    | -4.7                                      | 1.42 (1.32, 1.52)    | -26.0 |
| Vaccination Claims <sup>c</sup>            | No Claim (Reference)    | 4.0               |                      |                                              |                      |                                           |                      |       |
|                                            | 1 or More               | 6.7               | 2.71 (2.53, 2.88)    | 1.76 (1.64, 1.87)                            | 1.67 (1.59, 1.76)    | -5.1                                      | 1.37 (1.30, 1.44)    | -22.2 |
| Nirmatrelvir Contraindication <sup>d</sup> | None (Reference)        | 4.3               |                      |                                              |                      |                                           |                      |       |
|                                            | Relative                | 6.4               | 2.16 (2.06, 2.25)    | 1.64 (1.57, 1.71)                            | 1.62 (1.54, 1.69)    | -1.2                                      | 1.43 (1.36, 1.5)     | -12.8 |

|          |     |                   |                   |                   |      |                   |       |
|----------|-----|-------------------|-------------------|-------------------|------|-------------------|-------|
| Strict   | 6.1 | 1.81 (1.66, 1.95) | 1.44 (1.34, 1.53) | 1.44 (1.34, 1.54) | 0.0  | 1.26 (1.17, 1.36) | -12.5 |
| Model R2 | --  | --                | 0.008             | 0.01              | 25.0 | 0.021             | 110.0 |

<sup>a</sup> “Other” race includes American Indian or Alaska Native; Asian; Native Hawaiian or Pacific Islander; these are the four options for self-identified race in the Medicare enrollment file besides White and Black race or Hispanic/Latino. Less than 1% of beneficiaries are coded as “unknown” race.

<sup>b</sup> For the chronic condition count, the presence of 27 conditions was gathered from the Chronic Condition Data Warehouse, which uses claims since 1999 to describe Medicare beneficiaries’ accumulated chronic disease burden. Co-morbidities were defined as any condition present by as of December 31, 2020.

<sup>c</sup> Receipt of vaccination for COVID-19 over the period January 2020 through December 2022, classified as having  $\geq 1$  vaccine claims or having no vaccine claims, which could include both unvaccinated beneficiaries and those who received vaccines without billing Medicare.

<sup>d</sup> We combined drug tiers and indicators for kidney or liver disease into 3 levels of potential nirmatrelvir contraindications: 1) no liver or kidney disease and no drug-drug interactions (no contraindication), 2) any tier 1 interactions and/or liver/kidney disease (moderate contraindication), and 3) any tier 2 drug interaction, with or without liver/kidney disease (severe contraindication).

**eFigure 1.** Hospitalizations and mortality prevent with counterfactual redistribution of nirmatrelvir in 2022

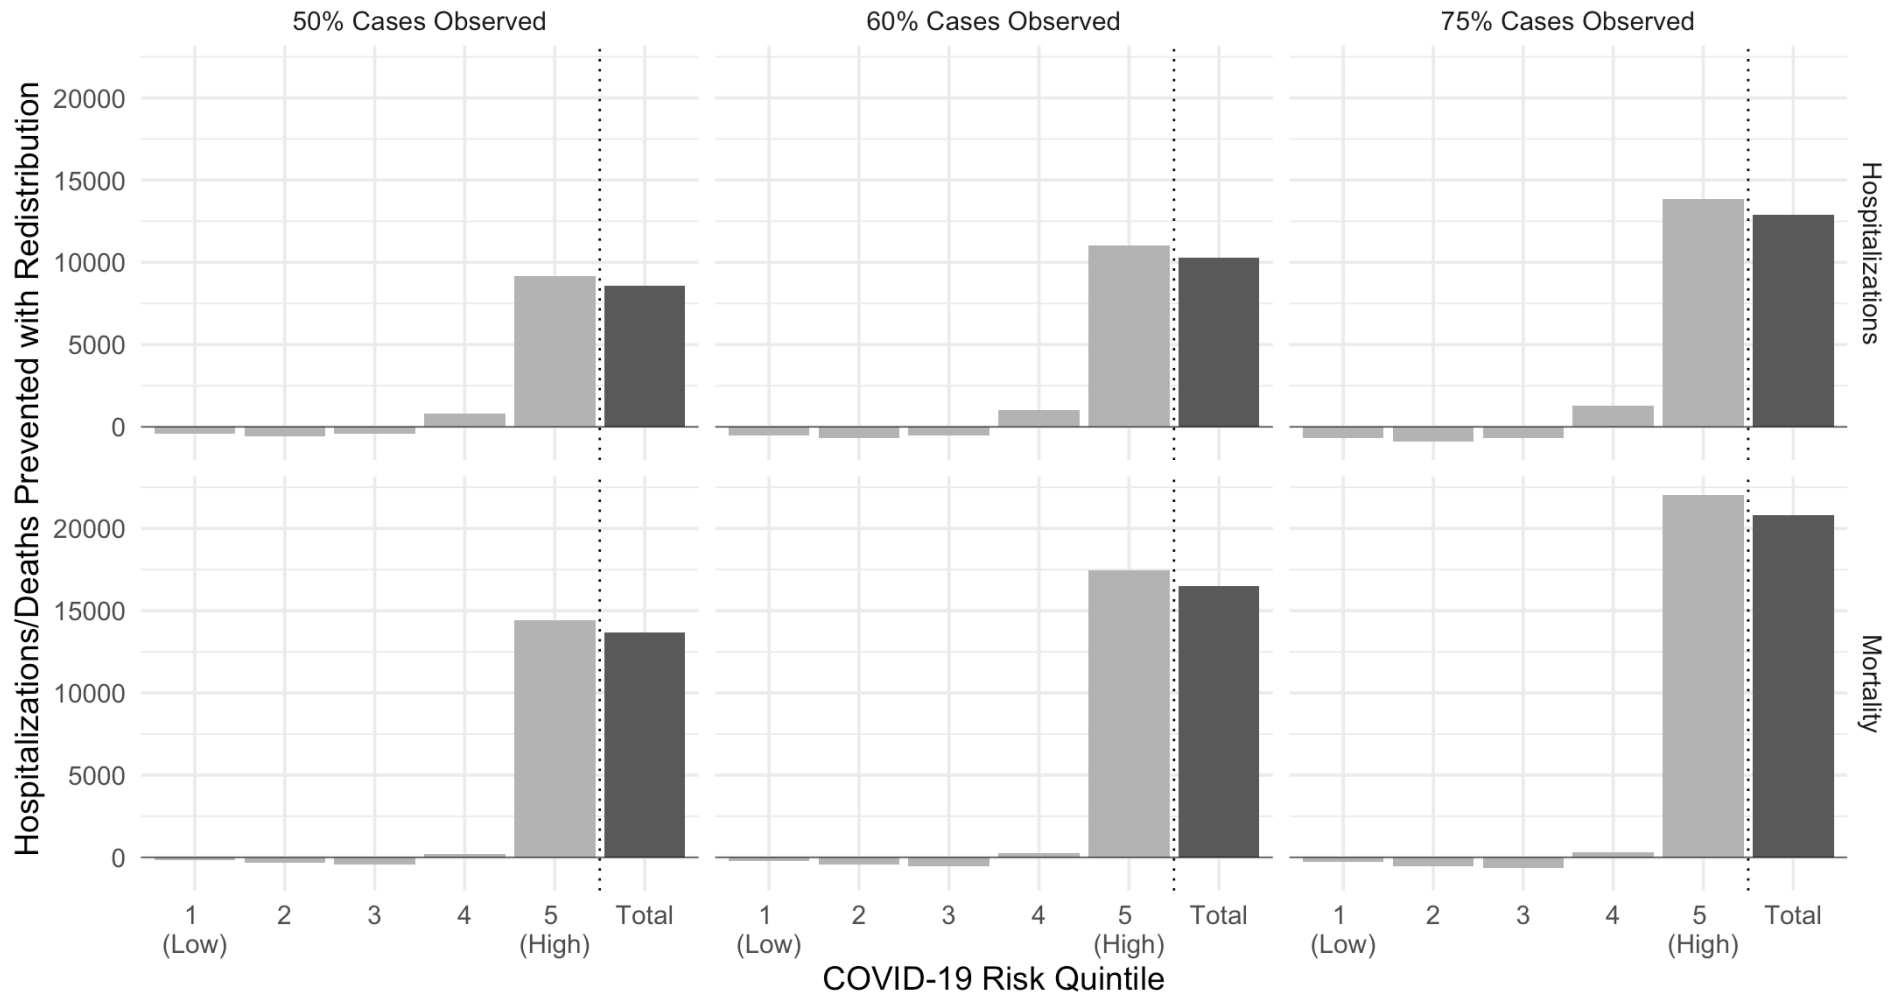

See eMethods 4 for details. We assumed a  $\sigma = 40\%$  reduction in the risk of hospitalization and a  $\sigma = 70\%$  reduction in mortality risk. Using these values, we calculated the counterfactual change in adverse outcomes (hospitalizations or mortality) under the treatment redistribution scenarios outlined above, under a range of case ascertainment rates  $a$  from 50% to 75%. As a lower bound, assuming 50% ascertainment and 50% treatment efficacy, reallocation of nirmatrelvir would have averted an estimated 9,671 deaths (9.74% reduction); and as an upper bound, assuming 75% ascertainment and 90% treatment efficacy, reallocation would have averted an estimated 27,135 deaths (27.3% reduction).
