# Supplementary material for: Clinical Risk and Outpatient Therapy Utilization for COVID-19 in the Medicare Population
Source: PubMed Central journal article supplement (PMC10818223; doi:10.1001/jamahealthforum.2023.5044), 2024-01-26
Supplement: jamahealthforum-e235044-s002.pdf [file jamahealthforum-e235044-s002.pdf]

## Data Sharing Statement

Wilcock. Clinical Risk and Outpatient Therapy Utilization for COVID-19 in the Medicare Population. *JAMA Health Forum*. Published January 26, 2024.  
doi:10.1001/jamahealthforum.2023.5044

### Data

**Data available:** No
